1  
2  
3  
4  
5  
6  
7  
8  
9  
10  
11  
12  
13  
14  
15  
16

**Identification of *kit-ligand a* as the Gene Responsible for the Medaka  
Pigment Cell Mutant *few melanophore***

Yuji Otsuki,\* Yuki Okuda,\* Kiyoshi Naruse,<sup>†‡</sup> and Hideyuki Saya<sup>\*.1</sup>

\*Division of Gene Regulation, Institute for Advanced Medical Research, Keio  
University School of Medicine, Tokyo 160-8582, Japan

<sup>†</sup>National Institute for Basic Biology, Okazaki, Aichi 444-8585, Japan

<sup>‡</sup>Department of Basic Biology, School of Life Science, Graduate University for  
Advanced Studies (SOKENDAI), Okazaki, Aichi 444-8587, Japan

IRB number: 30-043-2

1 Running title: Mutation of *kitlga* in *fm* medaka

2

3 Keywords: medaka, *few melanophore* mutant, *kit-ligand*, melanophore, leucophore

4

5 <sup>1</sup>Correspondence: Hideyuki Saya, Division of Gene Regulation, Institute for Advanced

6 Medical Research, Keio University School of Medicine, 35 Shinanomachi, Shinjuku-ku,

7

Tokyo 160-8582, Japan.

8

Tel.: +81-3-5363-3981. Email: hsaya@a5.keio.jp

9

1 **ABSTRACT**

2 The body coloration of animals is due to pigment cells derived from neural crest cells,  
3 which are multipotent and differentiate into diverse cell types. Medaka (*Oryzias latipes*)  
4 possesses four distinct types of pigment cells known as melanophores, xanthophores,  
5 iridophores, and leucophores. The *few melanophore (fm)* mutant of medaka is  
6 characterized by reduced numbers of melanophores and leucophores. We here identify  
7 *kit-ligand a (kitlga)* as the gene whose mutation gives rise to the *fm* phenotype. This  
8 identification was confirmed by generation of *kitlga* knockout medaka and the findings  
9 that these fish also manifest reduced numbers of melanophores and leucophores and fail  
10 to rescue the *fm* mutant phenotype. We also found that expression of *sox5*, *pax7a*, *pax3a*,  
11 and *mitfa* genes is down-regulated in both *fm* and *kitlga* knockout medaka, implicating  
12 c-Kit signaling in regulation of the expression of these genes as well as the encoded  
13 transcription factors in pigment cell specification. Our results may provide insight into  
14 the pathogenesis of c-Kit-related pigmentation disorders such as piebaldism in humans,  
15 and our *kitlga* knockout medaka may prove useful as a tool for drug screening.

16

17



## 1 INTRODUCTION

2 The body coloration of animals is attributable to pigment cells in the skin that are  
3 derived from neural crest cells and which provide protection from ultraviolet light as  
4 well as play a role in sexual selection and mimesis. Whereas mammals and birds  
5 possess a single type of pigment cell known as a melanocyte, six types of pigment cells  
6 known as chromatophores—melanophores (black), xanthophores (yellow), iridophores  
7 (iridescent), erythrophores (red), cyanophores (blue), and leucophores (white)—have  
8 been identified in fish (Fujii 1993). Given that these pigment cells are all derived from  
9 neural crest cells and can be readily distinguished on the basis of their color, fish have  
10 been studied as model organisms for characterization of the mechanisms underlying  
11 regulation of cell fate determination in multipotent cells. Medaka (*Oryzias latipes*)  
12 possesses four of these chromatophore types: melanophores, xanthophores, iridophores,  
13 and leucophores (Takeuchi 1976; Kelsh *et al.* 1996; Kelsh *et al.* 2004).

14 Intermediate progenitors and key transcription factors required for fate  
15 specification in neural crest cells have been identified (Bhatt *et al.* 2013). Although the  
16 molecular mechanisms of melanophore differentiation in fish have been relatively well  
17 characterized, those underpinning the differentiation of other pigment cell types have  
18 remained largely unknown. Characterization of the molecular mechanisms responsible  
19 for abnormal body coloration is expected to provide insight into the development of  
20 chromatophores, with such mutants also being applicable to the screening of drugs and  
21 studies of regenerative medicine related to skin pigmentation disorders in humans.

22 Various medaka mutants with abnormal body coloration have been described  
23 (Tomita 1992), and causal genes for such mutants have been identified. Such medaka  
24 mutant collections provide an important resource for studies of the genetic basis of fate  
25 determination in neural crest cells. One such recessive mutant, *few melanophore (fm)*, is  
26 characterized by reduced numbers of melanophores and leucophores (Kelsh *et al.* 2004).  
27 The causal gene for this mutant has remained unknown, but its identification would be  
28 expected to provide insight into the differentiation of these two pigment cell types.

29 The *pax7a* gene has been implicated in fate specification of a shared, partially  
30 restricted progenitor of the xanthophore and leucophore lineages in medaka (Kimura *et al.*  
31 *al.* 2014), and *sox5* functions in a cell-autonomous manner to control the specification  
32 of xanthophores from the shared xanthophore-leucophore progenitor (Nagao *et al.*

1 2014). We have here adopted genetic approaches to identify the causal gene and  
2 molecular mechanisms underlying the phenotype of *fm* medaka. We found that the *fm*  
3 locus includes a mutated version of the *kit-ligand a* gene (*kitlga*, DK099743) and that  
4 expression of *pax7a*, *sox5*, *pax3a*, and *mitfa* is down-regulated in both *fm* and *kitlga*  
5 knockout (KO) medaka. Our results thus suggest that the abnormal coloration of *fm*  
6 medaka is caused by disruption of the *kitlga* gene.

## 8 MATERIALS AND METHODS

### 9 Medaka strains and maintenance

10 The *fm* strain (ID: MT48) of medaka has been described previously (Kelsh *et al.* 2004).  
11 The Sakyō strain (ID: WS1164) is normal with regard to the production of all four  
12 pigment cell types and was thus studied as the wild type (WT). The Kaga strain (ID:  
13 IB833) was used for crossing in genetic mapping. All medaka strains were obtained  
14 from NBRP Medaka (<https://shigen.nig.ac.jp/medaka/top/top.jsp>). Fish were maintained  
15 in a recirculating system with a 14-h-light, 10-h-dark cycle at 28°C. All medaka  
16 experiments were performed according to a protocol approved by the Animal Care and  
17 Use Committee of Keio University (permit no. 16041).

### 19 Observation of pigment cells

20 Larvae and adult fish were anesthetized with tricaine mesylate, and dorsal body images  
21 were obtained at a constant magnification and resolution (1280 × 968 pixels) with a  
22 Leica MZ12.5 stereomicroscope or a Nikon SMZ25 microscope. For counting the  
23 number of melanophores, scales of adults were treated with epinephrine (2 mg/ml) to  
24 induce melanin aggregation. Melanophores and leucophores on the dorsal side of each  
25 larva were counted at 3 days posthatching (dph), and embryos were also evaluated at  
26 stages 26, 30 and 36. The total area of leucophores of each embryo at stage 30 and the  
27 area of individual melanophores at stage 36 were measured with Image J software  
28 (Schneider *et al.* 2012). Xanthophores were counted in larvae and on the scales of adult  
29 fish observed under ultraviolet light after treatment with 10uM melatonin for 10min  
30 and fixation with 10% paraformaldehyde. Iridophores were evaluated on the basis of iris  
31 luminosity and with the use of Image J software (Schneider *et al.* 2012).

## 1 **Positional cloning of the gene mutated in *fm* medaka**

2 Crossing of the F<sub>1</sub> generation obtained by breeding the *fm* mutant with the Kaga strain  
3 yielded 156 F<sub>2</sub> offspring with the *fm* phenotype and 30 siblings with the WT phenotype,  
4 which were collected and subjected to bulk segregation analysis with the M-marker  
5 2009 system as described previously (Kimura and Naruse, 2010). For further  
6 recombination analysis, polymorphic markers were isolated with reference to the  
7 medaka genome database ([http://medakagb.lab.nig.ac.jp/Oryzias\\_latipes/index.html](http://medakagb.lab.nig.ac.jp/Oryzias_latipes/index.html)).  
8 Detailed information on the markers, including primers for polymerase chain reaction  
9 (PCR) amplification and restriction enzymes for genotyping, is provided in Table 1.

10

## 11 **5'-RACE analysis**

12 Body tissue of medaka at 3 dph was minced and then processed with a RNeasy Minikit  
13 (Qiagen) for extraction of total RNA. The RNA was subjected to reverse transcription  
14 (RT) for 15 min at 37°C with the use of a PrimeScript RT Reagent Kit with gDNA  
15 Eraser (Takara), after which the reaction was terminated by incubation at 85°C for 5 s.  
16 The resulting cDNA was subjected to 5' rapid amplification of cDNA ends (5'-RACE)  
17 with the use of a GeneRace Kit (Invitrogen) and with region-specific primers.

18

## 19 **Generation of *kitlga* KO medaka**

20 Gene targeting with the CRISPR/Cas9 system was performed as described previously  
21 (Ansai and Kinoshita 2014). The single guide RNAs (sgRNAs) were designed to target  
22 exons 2 and 4 of *kitlga* (see Figure 5A), and microinjection was performed with the  
23 Sakyo strain. Genomic DNA was purified from fin clips. For sequencing, exons 2 to 4  
24 of *kitlga* were amplified with the use of the Ampdirect reagent and BIOTAQ HS DNA  
25 polymerase (Shimadzu). The PCR incubation protocol included an initial incubation at  
26 95°C for 10 min; 35 cycles at 95°C for 30 s, 68°C for 30 s, and 72°C for 90 s; and a  
27 final incubation at 72°C for 10 min. The PCR products were separated by  
28 electrophoresis, purified with the use of a QIAquick Gel Extraction Kit (Qiagen), and  
29 sequenced. The PCR primers for amplification and sequencing were KLG ex2-F  
30 (5'-TGATCTTAGTCATGTTTTT-3') and Crispr-R  
31 (5'-AGCAGCACATGGACTTATTCC-3').

1

## 2 **Genotyping of *fm* medaka**

3 Genomic DNA was extracted from fin clips that were prepared from anesthetized fish  
4 and fixed in 100% methanol. The samples were suspended in 100 µl of lysis buffer [20  
5 mM Tris-HCl (pH 8.0), 5 mM EDTA, 400 mM NaCl, 0.3% SDS, and proteinase K (10  
6 mg/ml)], incubated at 56°C for at least 2 h, and then stored at –80°C until analysis. They  
7 were subsequently applied directly to a PCR reaction mixture containing Ampdirect  
8 (Shimadzu). The PCR conditions for *fm* medaka included an initial incubation at 95°C  
9 for 10 min; 35 cycles at 95°C for 30 s, 56°C for 30 s, and 72°C for 60 s; and a final  
10 incubation at 72°C for 10 min. The primers were KLG ex2-F (5'-  
11 TGATCTTAGTCATGTTTTT -3'), *fm* ex2-R  
12 (5'-TGTGTCACCTAACTACAGCATCT-3'), KLG ex5-F  
13 (5'-GTTATGATACAGGCACGTGGC-3'), and KLG ex5-R  
14 (5'-ACTGTTGTGAGTGACTGTTGC-3').

15

## 16 **RT and real-time PCR analysis**

17 Total RNA was extracted and subjected to RT as described for 5'-RACE. The resulting  
18 cDNA was subjected to real-time PCR analysis with the use of a Thermal Cycler Dice  
19 Real Time System (TAKARA BIO INC.). The PCR primers for medaka *kitlg*, *pax7a*,  
20 *sox5*, *pax3a*, and *mitfa* are listed in Table 2. The abundance of each target mRNA was  
21 normalized by that of elongation factor (EF)–1 $\alpha$  mRNA as an invariant control.

22

## 23 **Phylogenetic analysis of *kitlg* genes in teleosts**

24 A phylogenetic tree for *kitlg* genes was generated by the maximum likelihood method  
25 on the basis of amino acid sequences listed in Table S1 and with the use of MEGA-X  
26 software (Kumar *et al.* 2018).

27

## 28 **Statistical analysis**

29 Quantitative data are presented as means + 95% confidence interval and were compared  
30 among groups by one-way analysis of variance (ANOVA) followed by Tukey's post  
31 hoc test. A *p* value of <0.05 was considered statistically significant.



1

## 2 **Data availability**

3 All medaka strains are available from NBRP Medaka  
4 (<https://shigen.nig.ac.jp/medaka/top/top.jsp>). Supplemental files available at FigShare.  
5 Sequence data are available at GenBank; the accession numbers are listed in Table S1  
6 and 2.

7

## 8 **RESULTS**

### 9 **The *fm* medaka mutant has reduced numbers of melanophores and leucophores**

10 *fm* medaka is a spontaneous mutant discovered by Takahashi in 1965 and established by  
11 Tomita in 1971 (Tomita 1975). It was first described as having a reduced number of  
12 melanophores, but was later shown by Kelsh et al. (2004) to also be characterized by a  
13 reduced number of leucophores and an abnormal shape of melanophores. We first  
14 examined the numbers of melanophores, leucophores, and iridophores (determined by  
15 iris luminosity measurement) in embryos, larvae, and adults of WT, *fm* heterozygous  
16 (*fm het*), and *fm* medaka. Xanthophores were also examined in the scales of adult fish as  
17 well as on the lateral side of larvae examined under ultraviolet light.

18 Melanophores were apparent on the dorsal side and yolk sphere and  
19 leucophores were detected on the dorsal side of the head in WT embryos at stage 26  
20 (Figure 1A). Iridophores could not be examined because eyes were not silver at this  
21 stage. In contrast to WT and *fm het* medaka at this stage, melanophores were not found  
22 in the center of the head in *fm* embryos (Figure 1A–C). At stage 30, melanophores had  
23 spread throughout the lateral side of the back and their number had increased in WT and  
24 *fm het* medaka, whereas their number remained low in *fm* embryos (Figure 1D–F). The  
25 area of leucophore pigmentation was also narrower in *fm* medaka than in WT and *fm het*  
26 embryos (Figure 1D–F). At stage 36, many melanophores were visible throughout the  
27 entire body, with leucophores coexisting with melanophores along the back, of WT and  
28 *fm het* embryos (Figure 1G, H). The numbers of melanophores and leucophores in *fm*  
29 had remain lower than those in WT or *fm het* medaka (Figure 1G–I). Quantitative  
30 analysis revealed that the numbers of both melanophores and leucophores were  
31 significantly lower in *fm* embryos than in WT or *fm het* embryos from stages 26 to 36  
32 (Figure 1J, K). It was difficult to count the number of leucophores at stage 30, but the

1 total area of these cells was significantly lower in *fm* embryos than in WT or *fm het*  
2 embryos at this stage (Figure 1K). Moreover, melanophores appeared smaller in *fm*  
3 medaka than in WT and *fm het* embryos at stage 36 (Figure 1L). The luminosity value  
4 of iridophores at stage 30 or 36 did not differ among the three genotypes (Figure 1M).

5 Examination of WT and *fm het* larvae at 3 dph revealed that most  
6 melanophores colocalized with leucophores on the dorsal side and in the head region  
7 (Figure 2A). In *fm* medaka, although the differentiation of all chromatophores was  
8 apparent, and melanophores and leucophores were also positioned at the dorsal midline,  
9 the melanophores appeared smaller than in WT and *fm het* larvae (Figure 2A).

10 Furthermore, whereas the numbers of melanophores and leucophores had increased to  
11 ~25 in the dorsal midline of the trunk in WT and *fm het* larvae at 3 dph, those in the *fm*  
12 mutant remained significantly smaller (Figure 2B). There was no apparent difference in  
13 the number of xanthophores on the lateral side of larvae examined under ultraviolet  
14 light (Figure 2C). The luminosity value of iridophores in the iris of larvae at 3 dph also  
15 did not differ significantly among the three genotypes (Figure 2D, E).

16 The back of adult WT and *fm het* medaka appeared black as a result of the large  
17 number of melanophores, whereas the *fm* mutant appeared paler because of the  
18 continued reduction in melanophore number (Figure 3A). The numbers of  
19 melanophores and leucophores on scales were also larger for WT and *fm het* adults than  
20 for *fm* adults (Figure 3B, C). The number of xanthophores on scales did not differ  
21 significantly among adults of the three genotypes (Figure 3B, D). The luminosity value  
22 of iridophores in the iris was also similar for adults of all three genotypes (Figure 3E, F).  
23 As with embryos and larvae, there were no apparent differences in chromatophores  
24 between WT and *fm het* adults, consistent with the notion that *fm* is a recessive mutation  
25 that reduces the numbers of melanophores and leucophores specifically.

## 26 27 **The *fm* locus contains the *kitlga* gene**

28 To identify the *fm* locus, we adopted a positional cloning approach. Bulk segregation  
29 analysis with M-marker 2009 (Kimura and Naruse 2010) suggested that the *fm* locus  
30 was present in linkage group 6. Analysis of linkage among the *fm* locus and DNA  
31 markers in linkage group 6—including MID0602, MID0621, OLe1804f,

1 MF01SSA036H12, and MF01SSA105H04 (Naruse *et al.* 2004; Kimura and Naruse  
2 2010)—confirmed that *fm* maps to chromosome 6 (Figure 4A).

3 We next focused on the c-Kit signaling pathway given that c-Kit receptor  
4 mutants of zebrafish and guppy (Kelsh *et al.* 2004; Kottler *et al.* 2013) show marked  
5 similarity to the *fm* medaka mutant. In particular, the embryonic phenotype of the *fm*  
6 mutant, characterized by a reduced number and smaller size of melanophores, was  
7 found to be highly reminiscent of that of the zebrafish *sparse/kit* mutant (Kelsh *et al.*  
8 2004). We searched the genomic regions of *kita* (*kit receptor a*) and *kitb* (*kit receptor b*)  
9 in the Ensembl database? and found that *kita* is located on chromosome 4 and *kitb* on  
10 chromosome 1 of the medaka genome. An Ensembl-based search for the map position  
11 of the gene encoding Kit ligand (*kitlg*) revealed that this gene is located in scaffold121,  
12 which had not been mapped to a chromosome in MEDAKA1 (Ensembl release 93). The  
13 *kitlg* gene was subsequently mapped to the region spanning 2469132 to 2512640 bp of  
14 chromosome 6 (Ensembl genome assembly ASM223467v1). A second *kitlg* gene was  
15 also identified on chromosome 23, however. To examine the relation between these two  
16 *kitlg* genes, we constructed a phylogenetic tree of teleost *kitlg* genes based on amino  
17 acid sequences shown in Table S1. The *kitlg* gene on chromosome 6 of medaka was  
18 thus found to belong to the *kitlga* clade and that on chromosome 23 to the *kitlgb* clade  
19 (Figure S1). We therefore designated these two medaka *kitlg* genes as *kitlga* and *kitlgb*,  
20 respectively. We designed a *kitlga* gene marker and found that the gene maps to  
21 chromosome 6 between MID0602 and MID0621 and that there was no recombination  
22 between the *kitlga* gene marker and the *fm* phenotype (Figure 4A).

23 To determine whether the *fm* mutant harbors a mutation in *kitlga*, we performed  
24 RT-PCR analysis. Such analysis revealed deletion of a portion of *kitlga* cDNA in the  
25 mutant (Figure 4B). Analysis by 5'-RACE identified a 475-bp deletion corresponding to  
26 skipping of exons 2 to 5 (Figure 4C). Sequencing of this genomic region of *fm* medaka  
27 revealed substitution of the 3.6-kb region encompassing exons 2 to 5 of the WT gene  
28 with a 3.9-kb sequence of unknown origin (Figure 4D). The medaka *kitlga* gene  
29 comprises 10 exons with a 756-bp open reading frame that encodes a 252-amino acid  
30 protein. The *fm* mutation results in the generation of an open reading frame for a  
31 truncated protein that lacks the stem cell factor (SCF) domain and would therefore be  
32 expected to be nonfunctional (Figure 4E). A BLASTX analysis of the genomic

1 sequence of the mutated *kitlga* gene in *fm* medaka revealed that the insertion shows  
2 marked sequence similarity to the transposase encoded by the transposon  
3 *Caenorhabditis briggsae* 1 (*Tcb1*), which has been identified in the genomes of other  
4 fish species such as zebrafish and rainbow trout. Moreover, we found that this  
5 transposon-like sequence is also present at >100 additional regions of the current  
6 Ensembl genome assembly (for medaka ASM223467v1). These results suggested that  
7 the phenotype of *fm* medaka is attributable to insertion of a *Tcb1*-like transposon at the  
8 *kitlga* locus.

### 9 **CRISPR/Cas9-mediated knockout of the *kitlga* gene induces an *fm*-like phenotype**

10 To confirm *kitlga* as the causal gene of the *fm* mutant, we generated *kitlga* KO medaka  
11 with the use of the CRISPR/Cas9 system and sgRNAs targeted to the splice donor sites  
12 of exons 2 and 4 (Ansai and Kinoshita 2014). Microinjection of one cell-stage WT  
13 embryos resulted in the generation of some larvae with reduced numbers of  
14 melanophores and leucophores at 3 dph, a phenotype similar to that of the *fm* mutant.  
15 Control embryos injected with only sgRNA or Cas9 mRNA failed to give rise to larvae  
16 that mimicked the *fm* phenotype. We outcrossed the *kitlga* G<sub>0</sub> medaka with WT fish to  
17 obtain F<sub>1</sub> medaka, sequence analysis of which revealed that the CRISPR/Cas9 system  
18 induced a 9-bp deletion in exon 4 of *kitlga* that altered the amino acid sequence of the  
19 encoded protein (Figure 5A, B). We then generated homozygous *kitlga* KO medaka,  
20 which again manifested a phenotype indistinguishable from that of the *fm* mutant  
21 (Figure 5C, D). Given that the *kitlga* KO medaka were viable and fertile, we performed  
22 a complementation test to further verify that *kitlga* is the causal gene of the *fm* mutant.  
23 We obtained a total of 30 embryos from a cross between *kitlga* KO medaka and the *fm*  
24 mutant, with all larvae showing the same phenotype as the *fm* mutant (Figure 5C)  
25 characterized by reduced numbers of melanophores and leucophores (Figure 5D).  
26 Together, these results thus indicated that mutation of the *kitlga* gene is responsible for  
27 the *fm* phenotype of medaka.  
28

### 29 **Expression of *pax3a*, *pax7a*, *sox5*, and *mitfa* is down-regulated in *fm* medaka**

30 The *pax7a* gene is expressed in neural crest cells of medaka and functions as a  
31 molecular switch for the differentiation of multipotent progenitor cells into either  
32

1 xanthophores and leucophores or iridophores and melanophores, whereas the *sox5* gene  
2 is expressed in differentiating xanthophores and functions as a molecular switch in the  
3 specification of xanthophores versus leucophores (Kimura *et al.* 2014; Nagao *et al.*  
4 2014). Sox5 belongs to the SOXD group of proteins and also plays a role in formation  
5 of the cephalic neural crest (Perez-Alcala *et al.* 2004). Pax3 and Pax7 are closely related  
6 transcription factors of the Pax family that manifest similar DNA binding activity in  
7 vitro, and Pax3 regulates the promoter of the Mitf (mouse microphthalmia-associated  
8 transcription factor) gene (Schäfer *et al.* 1994; Lacosta *et al.* 2005). To examine the  
9 molecular mechanisms underlying the reduction in the numbers of melanophores and  
10 leucophores in *fm* and *kitlga* KO medaka, we therefore determined the expression levels  
11 of *pax7a*, *sox5*, *pax3a*, and *mitfa*. RT and real-time PCR analysis revealed that the  
12 expression of each of these four genes was down-regulated in *fm* and *kitlga* KO larvae  
13 relative to WT larvae (Figure S2), suggesting that such down-regulation may contribute  
14 to the mutant phenotype.

15

## 16 **DISCUSSION**

17 We have here identified *kitlga* as the gene responsible for the *fm* mutant of medaka,  
18 which is characterized by reduced numbers of melanophores and leucophores in  
19 embryos, larvae, and adult fish. Moreover, genomic PCR, RT-PCR, and 5'-RACE  
20 analyses revealed that the *fm* mutation is a deletion of exons 2 to 5 of *kitlga* and their  
21 replacement with a transposon-like sequence, which likely gives rise to a null allele of  
22 *kitlga*. Larvae of *kitlga* KO medaka established with the CRISPR/Cas9 system also  
23 manifested reduced numbers of melanophores and leucophores, and the progeny of a  
24 cross between *fm* and *kitlga* KO medaka showed the same phenotype, reinforcing the  
25 notion that *kitlga* is the causal gene of *fm* medaka.

26 Kit ligand, also known as stem cell factor (SCF), plays a key role in  
27 melanogenesis, gametogenesis, and hematogenesis in mammals (Copeland *et al.* 1990;  
28 Geissler *et al.* 1991). Homozygous mutation of the mouse Kit ligand gene *{(Kitl)?}*  
29 results in embryonic death due to severe macrocytic anemia, whereas heterozygous  
30 mutant animals are viable but manifest a wide spectrum of abnormalities including a  
31 variable extent of macrocytic anemia, a reduced number of mast cells, and reduced  
32 pigmentation including white spotting or a gray color of fur (Sarvella and Russell 1956;

1 Broudy 1997). In mouse melanogenesis, melanoblasts are specified from neural crest  
2 cells, with *Mitf* and *Kit* being the earliest known markers for melanoblasts. After their  
3 differentiation, melanoblasts migrate dorsolaterally through the dermis between the  
4 somites and the developing epidermis from embryonic day 10.5 (Mort *et al.* 2015). Both  
5 *fm* mutant and our homozygous *kitlga* KO medaka are viable and manifest reduced  
6 numbers of melanophores and leucophores. This phenotype is thus similar to that of the  
7 heterozygous *Kitl* mutant mice, which have a reduced number of melanocytes.

8 Zebrafish has two *kitlg* genes, *kitlga* and *kitlgb*, with the former, but not the  
9 latter, playing a key role in the survival and migration of melanophores (Hultman *et al.*  
10 2007). A zebrafish *kitlga* null mutant is viable and manifests a reduced number of  
11 melanophores, similar to our *kitlga* KO medaka. We found that medaka also harbors  
12 *kitlga* and *kitlgb* genes and that *kitlga* is the causal gene of the *fm* mutant, indicating that  
13 medaka *kitlga* is likely equivalent to zebrafish *kitlga*.

14 *Tcb1* belongs to the Tc family of transposons and has been identified in  
15 nematodes and fruit flies. Transposons of the Tc family are ~1.6 kb in size, are  
16 associated with a TA repeat sequence, and contain a DDE motif in the open reading  
17 frame encoding the transposase (Harris *et al.* 1990; Hoekstra *et al.* 1999). Their inverted  
18 terminal repeats (ITRs) comprise 20 to 400 bp and contain CAGT at the 5' end  
19 (Rosenzweig *et al.* 1983; Harris *et al.* 1988). The inserted sequence found in *kitlga* of  
20 *fm* medaka is similar to a *Tcb1*-like sequence found in other fish species. However, no  
21 ITR was associated with the *Tcb1*-like sequences detected in *fm* or WT medaka.  
22 Furthermore, this transposon-like sequence of medaka contains stop codons, indicating  
23 that the *kitlga* product in the *fm* mutant does not function like that in WT medaka. With  
24 the use of the dot plot program “dotmatcher”  
25 (<http://www.bioinformatics.nl/cgi-bin/emboss/dotmatcher>), we also did not find any  
26 other inverted repeats on either side of the inserted sequence in *fm* medaka, suggesting  
27 that the transposase is not active and that the insertion arose as the result of a “cut and  
28 paste” type mechanism.

29 c-Kit signaling activates the expression of *Mitf* via the Ras-Raf-Mek-Mapk and  
30 mechanistic target of rapamycin (mTOR) pathways in mammals, and *Mitf* promotes  
31 transcription of the gene for tyrosinase, which is the rate-limiting enzyme of melanin  
32 production (Rönstrand 2004; Liang *et al.* 2013). Given that the number of

1 melanophores is not reduced in the heterozygous *fm* mutant, partial loss of Kitlga  
2 production is likely not sufficient to result in down-regulation of the c-Kit signaling  
3 pathway. Melanophores of both *fm* medaka were found to be smaller than those of the  
4 WT at stage 36, whereas the size of leucophores or xanthophores in *fm* medaka did not  
5 differ from that in WT fish. The size of the remaining melanophores in *fm* embryos  
6 close to hatching was also previously found to be reduced (Kelsh *et al.* 2004).  
7 Furthermore, whereas melanophores were found to manifest an extended morphology  
8 beneath the epidermis in WT zebrafish larvae, they were rounded in the *spab5* mutant,  
9 which harbors a mutation in a *kit* ortholog (Parichy *et al.* 1999). These observations  
10 suggest that *kitlga* may contribute to the maturation or metabolism of melanophores as a  
11 result of activation of the expression of Mitfa by c-Kit signaling.

12         The genes *sox5*, *pax3a*, *pax7a*, and *mitf* play important roles in the development  
13 of chromatophores (Kimura *et al.* 2014; Nagao *et al.* 2014). We have now shown that  
14 the expression of these genes was suppressed in *kitlga* KO medaka, indicating that such  
15 expression is regulated by the Kitlga protein. Given that differentiation of all  
16 chromatophores from their multipotent progenitors is apparent in both *fm* and *kitlga* KO  
17 medaka, *kitlga* may influence the proliferation and migration of melanophores and  
18 leucophores after their differentiation. The development of iridophores and  
19 xanthophores is regulated by anaplastic lymphoma kinase (Alk) and leukocyte tyrosine  
20 kinase (Ltk) signaling and by colony-stimulating factor 1 (Csf1) signaling, respectively,  
21 in zebrafish (Patterson and Parichy 2013; Mo *et al.* 2017). These signaling pathways  
22 also may contribute to the proliferation and migration of the corresponding cell types in  
23 medaka (Figure S3).

24         Loss of function of c-Kit in humans gives rise to hypopigmentation-deafness  
25 disorders such as piebaldism and is also associated with certain tumor types such as  
26 thyroid carcinoma, melanoma, and breast cancer (Rönstrand 2004; Dahl *et al.* 2015;  
27 Zazo *et al.* 2015; Tramm *et al.* 2016; Franceschi *et al.* 2017). Mice with white spotting  
28 also harbor heterozygous loss-of-function mutations in the c-Kit gene (Geissler *et al.*  
29 1991). We did not detect tumors or organ abnormalities in either *fm* or *kitlga* KO  
30 medaka. Given that, as in the present study, changes in body coloration induced by  
31 drugs or genetic manipulation are readily detected in embryos or larvae of medaka

1 within a matter of hours or days, our *kitlga* KO medaka may prove useful as a tool for  
2 screening of drugs for conditions related to loss of c-Kit signaling.

3

#### 4 **ACKNOWLEDGMENTS**

5 We thank S. Kuninaka for assistance with the generation of *kitlga* KO medaka as well  
6 as other laboratory members for assistance. This work was supported by the National  
7 Institute of Basic Biology (NIBB) Collaborative Research Program (c-17-312 and  
8 a-13-103).

9



1 **LITERATURE CITED**

- 2 Ansai, S., and M. Kinoshita, 2014 Targeted mutagenesis using CRISPR/Cas system in  
3 medaka. *Biol. Open* 3: 362–371. <https://doi.org/10.1242/bio.20148177>
- 4 Bhatt, S., R. Diaz, and P. A. Trainor, 2013 Signals and switches in mammalian neural  
5 crest cell differentiation. *Cold Spring Harb. Perspect. Biol.* 5: a008326.  
6 <https://doi.org/10.1101/cshperspect.a008326>
- 7 Broudy, V. C., 1997 Stem cell factor and hematopoiesis. *Blood* 90: 1345–1364.
- 8 Copeland, N. G., D. J. Gilbert, B. C. Cho, P. J. Donovan, N. A. Jenkins, *et al.*, 1990  
9 Mast cell growth factor maps near the steel locus on mouse chromosome 10 and is  
10 deleted in a number of steel alleles. *Cell* 63: 175–183.  
11 [https://doi.org/10.1016/0092-8674\(90\)90298-S](https://doi.org/10.1016/0092-8674(90)90298-S)
- 12 Dahl, C., C. Abildgaard, R. Riber-Hansen, T. Steiniche, J. Lade-Keller, *et al.*, 2015 KIT  
13 is a frequent target for epigenetic silencing in cutaneous melanoma. *J. Invest.*  
14 *Dermatol.* 135: 516–524. <https://doi.org/10.1038/jid.2014.372>
- 15 Franceschi, S., F. Lessi, F. Panebianco, E. Tantillo, M. La Ferla, *et al.*, 2017 Loss of  
16 c-KIT expression in thyroid cancer cells. *PLoS One* 12: e0173913.  
17 <https://doi.org/10.1371/journal.pone.0173913>
- 18 Fujii, R., 1993 Cytophysiology of fish chromatophores. *Int. Rev. Cytol.* 143: 191–255.  
19 [https://doi.org/10.1016/S0074-7696\(08\)61876-8](https://doi.org/10.1016/S0074-7696(08)61876-8)
- 20 Geissler, E. N., M. Liao, J. D. Brook, F. H. Martin, K. M. Zsebo, *et al.*, 1991 Stem cell  
21 factor (SCF), a novel hematopoietic growth factor and ligand for c-kit tyrosine  
22 kinase receptor, maps on human chromosome 12 between 12q14.3 and 12qter.  
23 *Somat. Cell Mol. Genet.* 17: 207–214.
- 24 Harris, L. J., D. L. Baillie, and A. M. Rose, 1988 Sequence identity between an inverted  
25 repeat family of transposable elements in *Drosophila* and *Caenorhabditis*. *Nucleic*  
26 *Acids Res.* 16: 5991–5998.
- 27 Harris, L. J., S. Prasad, and A. M. Rose, 1990 Isolation and sequence analysis of  
28 *Caenorhabditis briggsae* repetitive elements related to the *Caenorhabditis elegans*  
29 transposon Tc1. *J. Mol. Evol.* 30: 359–369.

- 1 Hoekstra, R., M. Otsen, J. A. Lenstra, and M. H. Roos, 1999 Characterisation of a  
2 polymorphic Tc1-like transposable element of the parasitic nematode *Haemonchus*  
3 *contortus*. *Mol. Biochem. Parasitol.* 102: 157–166.
- 4 Hultman, K. A., N. Bahary, L. I. Zon, and S. L. Johnson, 2007 Gene duplication of the  
5 zebrafish kit ligand and partitioning of melanocyte development functions to kit  
6 ligand a. *PLoS Genet.* 3: e17. <https://doi.org/10.1371/journal.pgen.0030017>
- 7 Kelsh, R. N., M. Brand, Y. J. Jiang, C. P. Heisenberg, S. Lin, *et al.*, 1996 Zebrafish  
8 pigmentation mutations and the processes of neural crest development.  
9 *Development* 123: 369–389.
- 10 Kelsh, R. N., C. Inoue, A. Momoi, H. Kondoh, M. Furutani-Seiki, *et al.*, 2004 The  
11 Tomita collection of medaka pigmentation mutants as a resource for understanding  
12 neural crest cell development. *Mech. Dev.* 121: 841–859.  
13 <https://doi.org/10.1016/j.mod.2004.01.004>
- 14 Kimura, T., and K. Naruse, 2010 M-marker 2009, a marker set for mapping medaka  
15 mutants using PCR length polymorphisms with an automated microchip gel  
16 electrophoresis system. *BioTechniques* 49: 582–583.  
17 <https://doi.org/10.2144/000113467>
- 18 Kimura, T., Y. Nagao, H. Hashimoto, Y. Yamamoto-Shiraishi, S. Yamamoto, *et al.*,  
19 2014 Leucophores are similar to xanthophores in their specification and  
20 differentiation processes in medaka. *Proc. Natl. Acad. Sci. USA* 111: 7343–7348.  
21 <https://doi.org/10.1073/pnas.1311254111>
- 22 Kottler, V. A., A. Fadeev, D. Weigel, and C. Dreyer, 2013 Pigment pattern formation in  
23 the guppy, *Poecilia reticulata*, involves the Kita and Csf1ra receptor tyrosine  
24 kinases. *Genetics* 194: 631–646. <https://doi.org/10.1534/genetics.113.151738>
- 25 Kumar, S., G. Stecher, M. Li, C. Knyaz, and K. Tamura, 2018 MEGA X: Molecular  
26 Evolutionary Genetics Analysis across computing platforms. *Mol. Biol. Evol.* 35:  
27 1547–1549. <https://doi.org/10.1093/molbev/msy096>
- 28 Lacosta, A. M., P. V. Muniesa, J. Ruberte, M. Sarasa, and L. Dominguez, 2005 Novel  
29 expression patterns of Pax3/Pax7 in early trunk neural crest and its melanocyte and

- 1 non-melanocyte lineages in amniote embryos. *Pigment Cell Res.* 18: 243–251.  
2 <https://doi.org/10.1111/j.1600-0749.2005.00238.x>
- 3 Liang, J., Y. L. Wu, B. J. Chen, W. Zhang, Y. Tanaka, *et al.*, 2013 The c-kit  
4 receptor-mediated signal transduction and tumor-related diseases. *Int. J. Biol. Sci.*  
5 9: 435–443. <https://doi.org/10.7150/ijbs.6087>
- 6 Mo, E. S., Q. Cheng, A. V. Reshetnyak, J. Schlessinger, and S. Nicoli, 2017 Alk and Ltk  
7 ligands are essential for iridophore development in zebrafish mediated by the  
8 receptor tyrosine kinase Ltk. *Proc. Natl. Acad. Sci. USA* 114: 12027–12032.  
9 <https://doi.org/10.1073/pnas.1710254114>.
- 10 Mort, R. L., I. J. Jackson, and E. E. Patton, 2015 The melanocyte lineage in  
11 development and disease. *Development* 142: 620–632.  
12 <https://doi.org/10.1242/dev.106567>
- 13 Nagao, Y., T. Suzuki, A. Shimizu, T. Kimura, R. Seki, *et al.*, 2014 Sox5 functions as a  
14 fate switch in medaka pigment cell development. *PLoS Genet.* 10: e1004246.  
15 <https://doi.org/10.1371/journal.pgen.1004246>
- 16 Naruse, K., M. Tanaka, K. Mita, A. Shima, J. Postlethwait, *et al.*, 2004 A medaka gene  
17 map: the trace of ancestral vertebrate proto-chromosomes revealed by comparative  
18 gene mapping. *Genome Res.* 14: 820–828. <https://doi.org/10.1101/gr.2004004>
- 19 Parichy, D. M., J. F. Rawls, S. J. Pratt, T. T. Whitfield, and S. L. Johnson, 1999  
20 Zebrafish sparse corresponds to an orthologue of c-kit and is required for the  
21 morphogenesis of a subpopulation of melanocytes, but is not essential for  
22 hematopoiesis or primordial germ cell development. *Development* 126:  
23 3425–3436.
- 24 Patterson, L. B., and D. M. Parichy, 2013 Interactions with iridophores and the tissue  
25 environment required for patterning melanophores and xanthophores during  
26 zebrafish adult pigment stripe formation. *PLoS Genet.* 9: e1003561. <https://doi.org/10.1371/journal.pgen.1003561>  
27

- 1 Perez-Alcala, S., M. A. Nieto, and J. A. Barbas, 2004 LSox5 regulates RhoB expression  
2 in the neural tube and promotes generation of the neural crest. *Development* 131:  
3 4455–4465. <https://doi.org/10.1242/dev.01329>
- 4 Rönstrand, L., 2004 Signal transduction via the stem cell factor receptor/c-Kit. *Cell.*  
5 *Mol. Life Sci.* 61: 2535–2548. <https://doi.org/10.1007/s00018-004-4189-6>
- 6 Rosenzweig, B., L. W. Liao, and D. Hirsh, 1983 Sequence of the *C. elegans*  
7 transposable element Tc1. *Nucleic Acids Res.* 11: 4201–4209.  
8 <https://doi.org/10.1093/nar/11.12.4201>
- 9 Sarvella, P. A., and L. B. Russell, 1956 Steel, a new dominant gene in the house mouse:  
10 with effects on coat pigment and blood. *J. Heredity* 47: 123–128.  
11 <https://doi.org/10.1093/oxfordjournals.jhered.a106620>
- 12 Schäfer, B. W., T. Czerny, M. Bernasconi, M. Genini, and M. Busslinger, 1994  
13 Molecular cloning and characterization of a human PAX-7 cDNA expressed in  
14 normal and neoplastic myocytes. *Nucleic Acids Res.* 22: 4574–4582.
- 15 Schneider, C. A., W. S. Rasband, and K. W. Eliceiri, 2012 NIH Image to ImageJ: 25  
16 years of image analysis. *Nat. Methods* 9: 671–675.  
17 <https://doi.org/10.1038/nmeth.2089>
- 18 Takeuchi, I. K., 1976 Electron microscopy of two types of reflecting chromatophores  
19 (iridophores and leucophores) in the guppy, *Lebistes reticulatus* Peters. *Cell Tissue*  
20 *Res.* 173: 17–27.
- 21 Tomita, H., 1975 Mutant genes in the medaka, pp. 251–272 in *Medaka (Killifish):*  
22 *Biology and Strains (Series of Stock Culture in Biological Field)*, edited by T.  
23 Yamamoto. Keigaku Publishing Company, Tokyo.
- 24 Tomita, H., 1992 The lists of the mutants and strains of the medaka, common gambusia,  
25 silver crucian carp, goldfish, and golden venus fish maintained in the Laboratory of  
26 Freshwater Fish Stocks, Nagoya University. *Fish Biol. J. Medaka* 4: 45–47.
- 27 Tramm, T., J. Y. Kim, S. Leibl, F. Moinfar, and F. A. Tavassoli, 2016 Expression of  
28 C-KIT, CD24, CD44s, and COX2 in benign and non-invasive apocrine lesions of

- 1 the breast. *Virchows Arch.* 469: 285–295.
- 2 <https://doi.org/10.1007/s00428-016-1966-1>
- 3 Zazo Seco, C., L. Serrão de Castro, J. W. van Nierop, M. Morín, S. Jhangiani *et al.*,
- 4 2015 Allelic mutations of KITLG, encoding KIT ligand, cause asymmetric and
- 5 unilateral hearing loss and Waardenburg syndrome type 2. *Am. J. Hum. Genet.* 97:
- 6 647–660. <https://doi.org/10.1016/j.ajhg.2015.09.011>

## 1 **FIGURE LEGENDS**

2 **Figure 1** The numbers of melanophores and leucophores are reduced in embryos of *fm*  
3 medaka. (A–I) Photographs of WT (A, D, G), *fm het* (B, E, H), and *fm* (C, F, I)  
4 medaka embryos at stage 26 (A–C), stage 30 (D–F), or stage 36 (G–I). Arrowheads  
5 indicate a reduced number of leucophores on the dorsal head (A–C), a narrower area of  
6 leucophore pigmentation (D–F), or stage 36 (G–I) in *fm* medaka compared with WT or  
7 *fm het* embryos. Scale bar, 1 mm. (J) Number of melanophores in embryos of the three  
8 genotypes at stages 26, 30, and 36. (K) Number or total area of leucophores at stages 26  
9 and 36 or at stage 30, respectively. (L) Area of individual melanophores at stage 36. (M)  
10 Luminosity value of iridophores at stages 30 and 36. All quantitative data are means +  
11 95% confidence interval ( $n = 15$  larvae for each genotype). The  $p$  values were  
12 determined by one-way ANOVA followed by Tukey's post hoc test.

13

14 **Figure 2** Reduced numbers of melanophores and leucophores in *fm* medaka larvae at 3  
15 dph. (A) Photographs of the dorsal side of WT, *fm het*, and *fm* larvae. Insets show  
16 higher magnification views. Scale bar, 1 mm. (B) Numbers of melanophores and  
17 leucophores on the dorsal side of the body for larvae of the three genotypes. (C)  
18 Photographs of the lateral side of larvae under ultraviolet illumination. (D) Photographs  
19 of the lateral side of larvae showing the iris. (E) Luminosity value of iridophores in the  
20 iris. All quantitative data are means + 95% confidence interval ( $n = 15$  larvae for each  
21 genotype). The  $p$  values were determined by one-way ANOVA followed by Tukey's  
22 post hoc test.

23

24 **Figure 3** Reduced numbers of melanophores and leucophores in adult *fm* medaka. (A)  
25 Photographs of the dorsal side of adult WT, *fm het*, and *fm* medaka. Scale bar, 1 cm. (B)  
26 Photographs of the scales of adult medaka of the three genotypes. (C) Numbers of  
27 melanophores and leucophores for scales on the dorsal side of adult medaka. (D)  
28 Number of xanthophores for scales on the dorsal side of adult medaka. (E) Photographs  
29 of the lateral side of adult medaka showing the iris. (F) Luminosity value of iridophores  
30 in the iris of adult medaka. All quantitative data are means + 95% confidence interval ( $n$   
31 = 15 adults for each genotype). The  $p$  values were determined by one-way ANOVA  
32 followed by Tukey's post hoc test.

1

2 **Figure 4** Mapping of the *fm* locus. (A) The *fm* locus was mapped to the region between  
3 MID0602 and MID0621 in linkage group 6 (LG6). A *kitlga* gene marker did not show  
4 any recombination with the *fm* phenotype (indicated by the numbers in parentheses). (B)  
5 RT-PCR analysis of total RNA from WT and *fm* medaka with the primer set indicated  
6 by the blue arrows in (C). (C) The *kitlga* gene of WT medaka comprises 10 exons  
7 (numbered boxes). Sequencing of cDNA generated by 5'-RACE showed that exons 2 to  
8 5 are skipped in the *fm* mutant. The 5' and 3' untranslated regions are shown in black,  
9 and exonic sequence encoding the SCF domain in red. (D) Sequencing of genomic  
10 DNA revealed that exons 2 to 5 (3.6 kb) of *kitlga* are replaced with a 3.9-kb sequence  
11 (green line) in the *fm* genome. (E) The WT *kitlga* gene encodes a 252–amino acid  
12 protein containing an SCF domain (red box). The *fm* mutation is predicted to result in  
13 the generation of a truncated protein, with the gray box representing the altered frame.  
14

15 **Figure 5** Targeting of the *kitlga* gene by the CRISPR/Cas9 system gives rise to an  
16 *fm*-like phenotype. (A) Sequencing of the CRISPR/Cas9 target region in manipulated  
17 medaka revealed a 9-bp deletion in exon 4 of *kitlga*. The upper and lower panels show  
18 the WT and mutated sequences of *kitlga*, respectively. Green, blue, black, and red traces  
19 indicate A, C, G, and T nucleotides, respectively. The sgRNA target sequences are  
20 shaded yellow and green. (B) Predicted amino acid sequences for *kitlga* in WT and  
21 *kitlga* KO medaka. The 9-bp deletion in exon 4 results in the deletion of three amino  
22 acids. (C) Photographs of WT, *fm*, and homozygous *kitlga* KO larvae at 3 dph as well as  
23 of a corresponding F<sub>1</sub> larva derived from a cross between the *fm* mutant and *kitlga* KO  
24 medaka. Insets show higher magnification views. The body color of the *kitlga* KO  
25 medaka and of the cross between the *fm* and *kitlga* KO fish is similar to that of the *fm*  
26 mutant, indicating that the *kitlga* mutant could not rescue the *fm* phenotype. (D)  
27 Numbers of melanophores and leucophores on the dorsal side of the body of larvae as in  
28 (C). Data are means + 95% confidence interval ( $n = 15$  larvae for each genotype). The  $p$   
29 values were determined by one-way ANOVA followed by Tukey's post hoc test.

30

31 **Figure S1** Molecular phylogeny of the *kitlg* gene in teleosts. The predicted amino acid  
32 sequences of *kitlg* genes of various species were downloaded from GenBank or

1 Ensembl for construction of a phylogenetic tree by the maximum likelihood method with  
2 1000-bootstrap replication. Spotted gar was examined as an outlier. The numbers at  
3 each node indicate bootstrap probability. Gene names, species, GenBank accession  
4 numbers or Ensembl IDs, and amino acid sequences are provided in Table S1.

5  
6 **Figure S2** Reduced expression of pigmentation-related genes in larvae of *fm* and *kitlga*  
7 KO medaka at 3 dph. Total RNA isolated from WT, *fm het*, *fm*, and *kitlga* KO larvae  
8 was subjected to RT and real-time PCR analysis of *pax7a* (A), *sox5* (B), *pax3a* (C), and  
9 *mitfa* (D) expression. Data were normalized by the amount of GAPDH mRNA and Data  
10 are means  $\pm$  95% confidence interval from three independent experiments. The *p* values  
11 were determined by one-way ANOVA followed by Tukey's post hoc test.

12  
13 **Figure S3** Model for chromatophore differentiation, proliferation, and migration from  
14 the neural crest. Melanophores and iridophores develop from a shared progenitor, as do  
15 xanthophores and leucophores. We propose that the proliferation and migration of  
16 leucophores and melanophores are regulated by c-Kit signaling, whereas the  
17 development of iridophores and xanthophores are thought to be regulated by Alk-Ltk  
18 signaling and Csf1 signaling, respectively.

19



WT

*fm het**fm*

bioRxiv preprint doi: <https://doi.org/10.1101/713107>; this version posted July 24, 2019. The copyright holder for this preprint (which was not certified by peer review) is the author/funder, who has granted bioRxiv a license to display the preprint in perpetuity. It is made available under aCC-BY-NC-ND 4.0 International license.

Stage 26

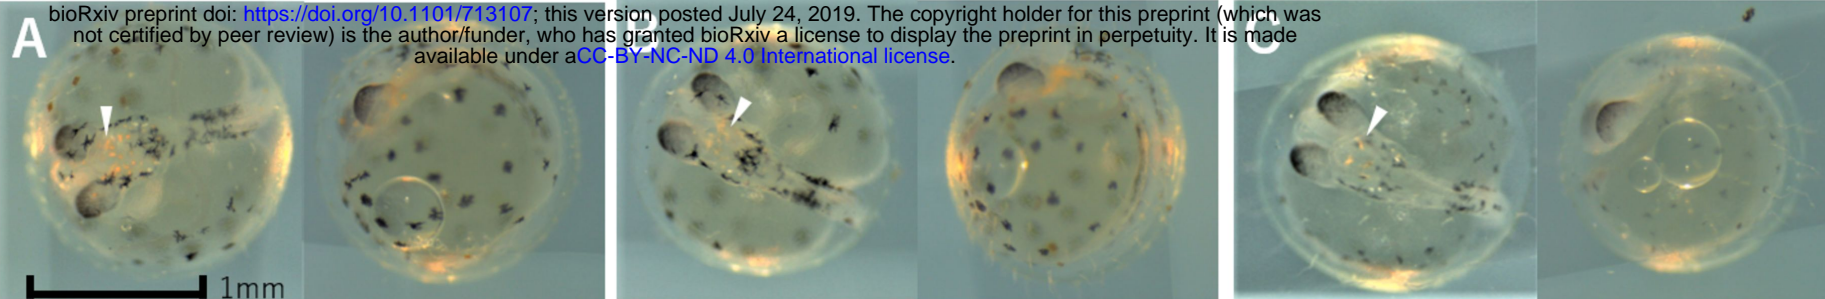

Stage 30

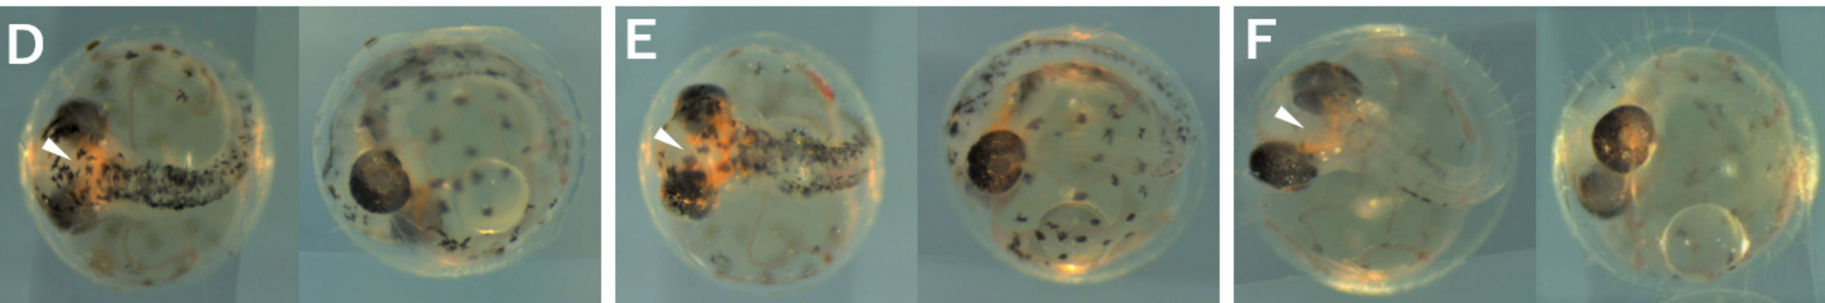

Stage 36

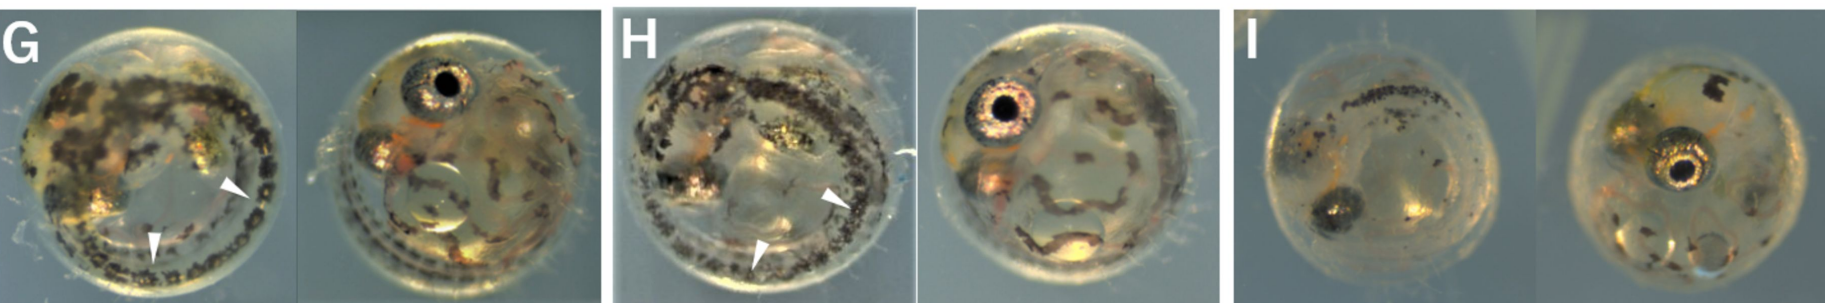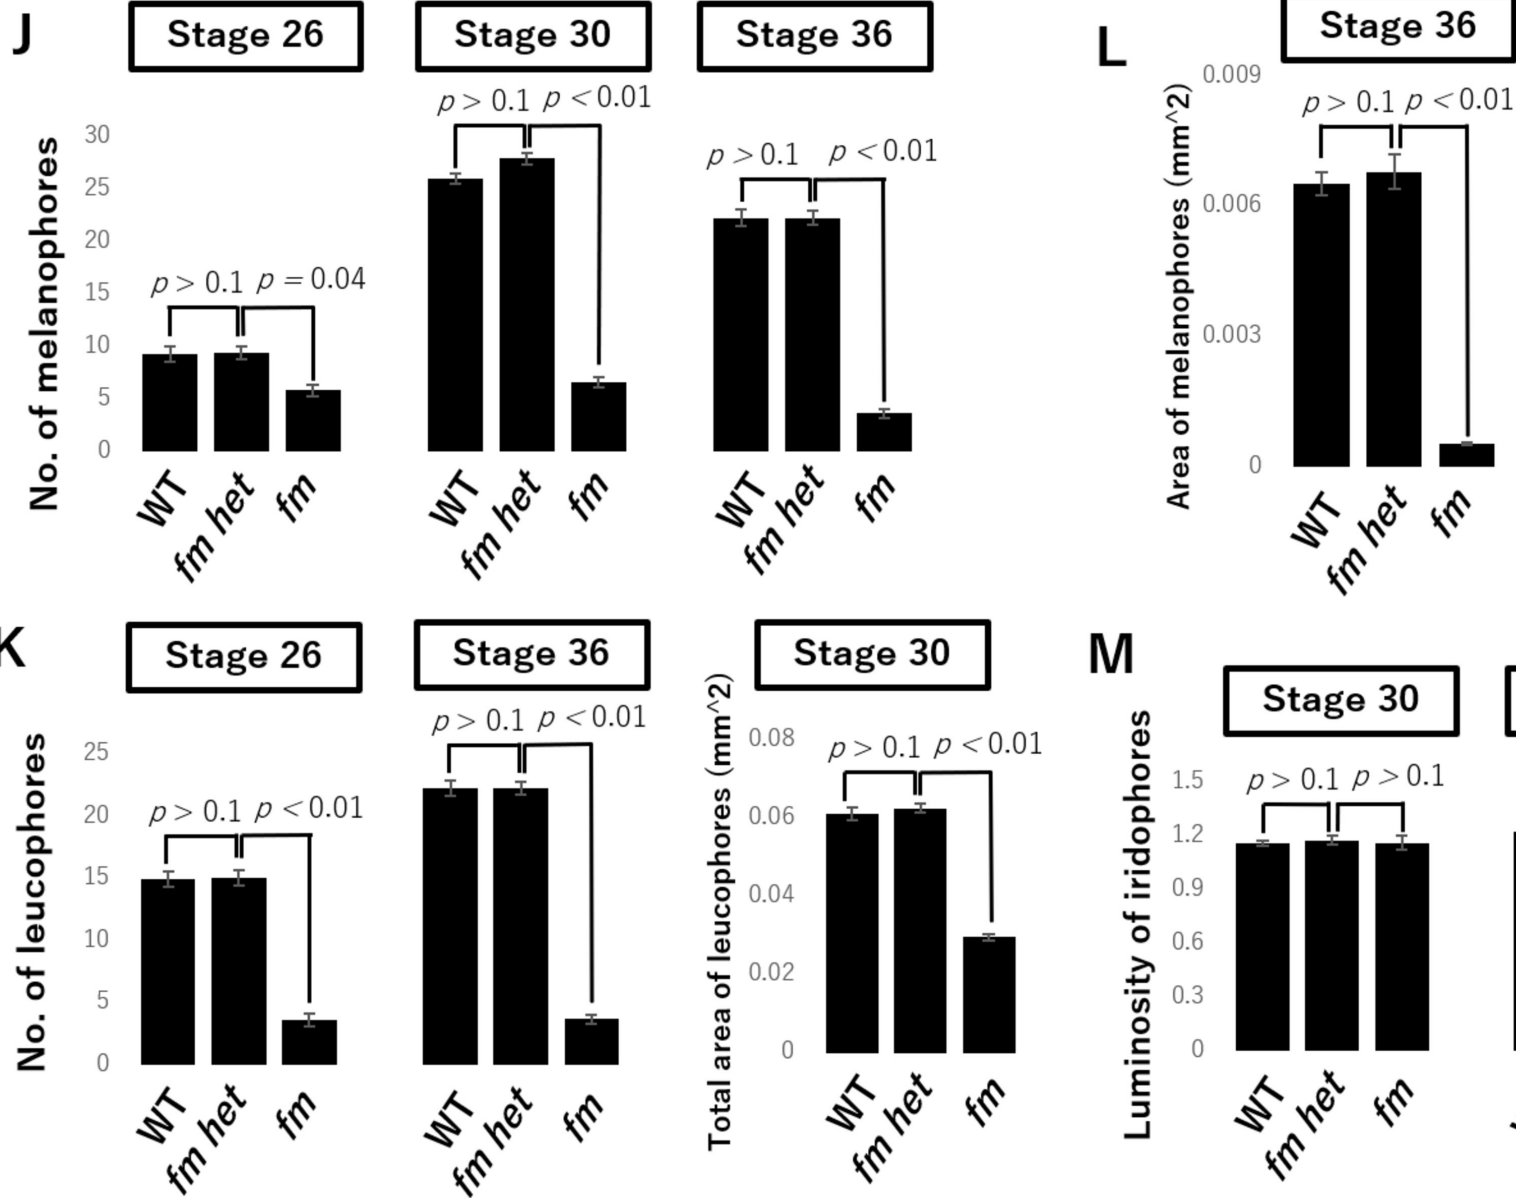

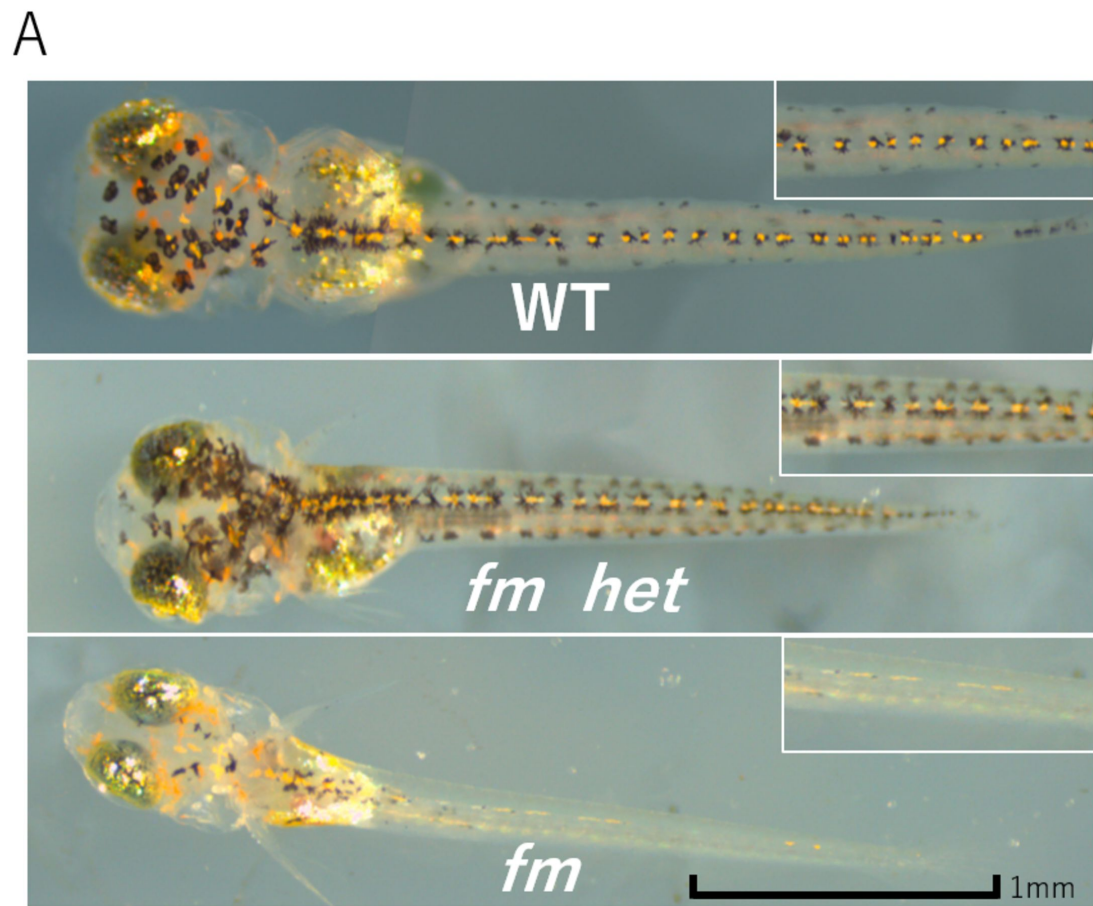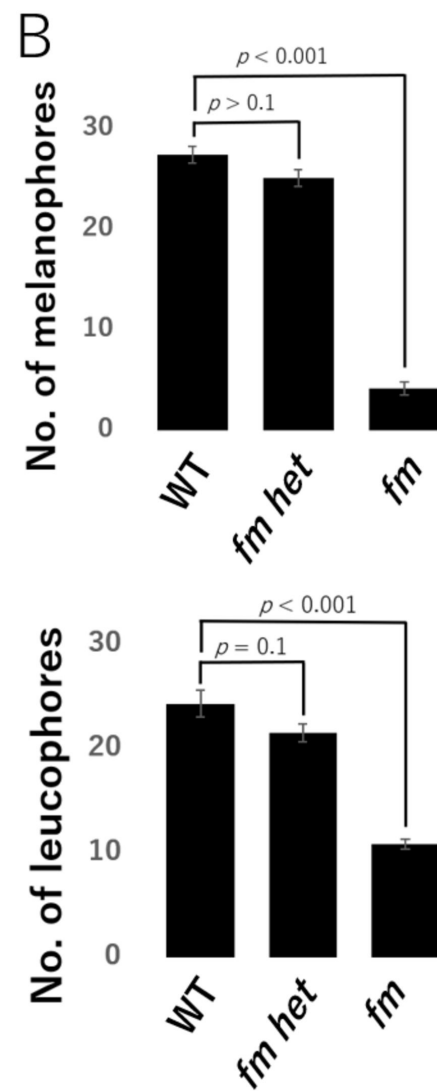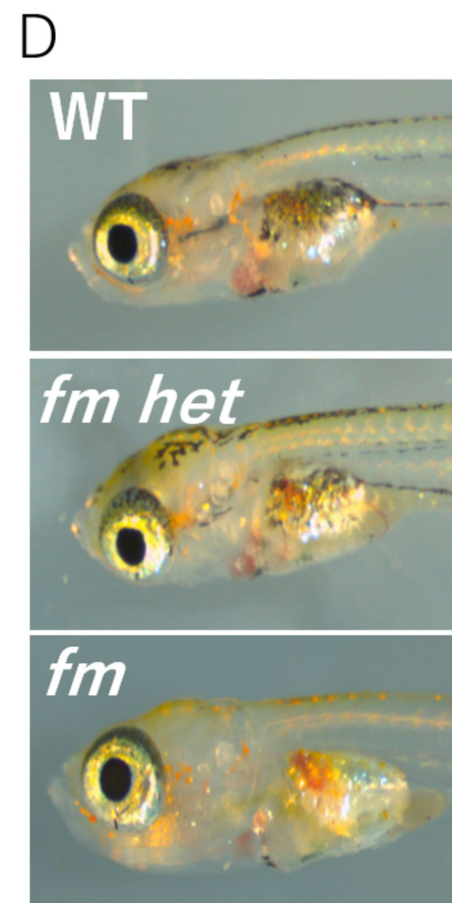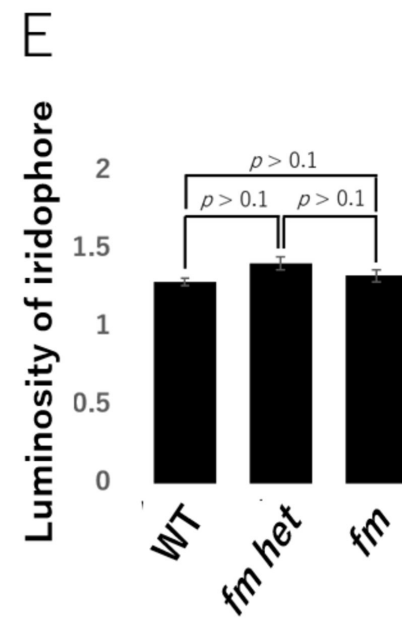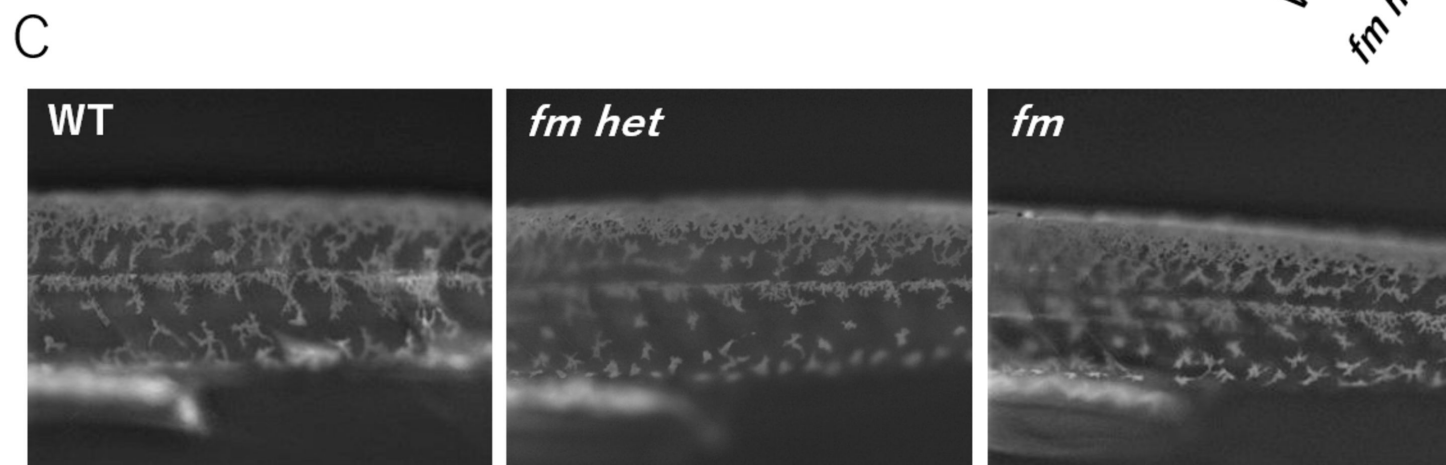

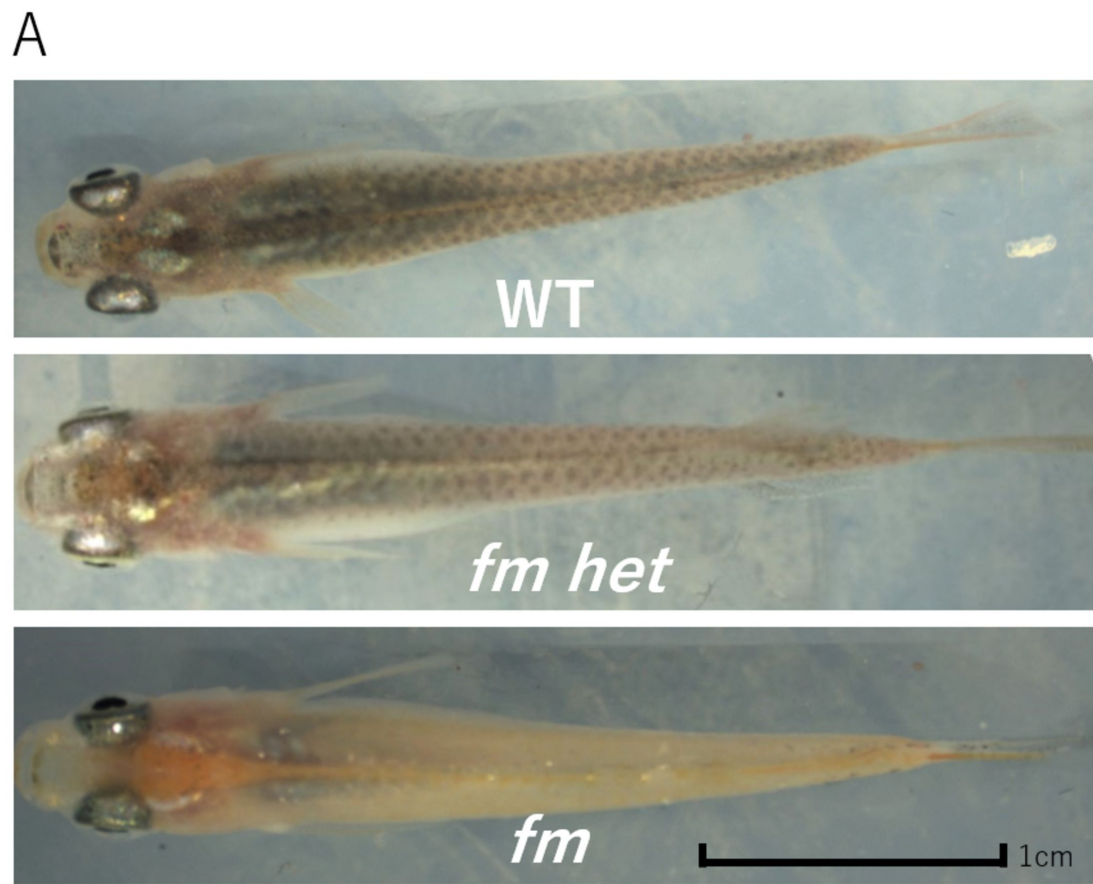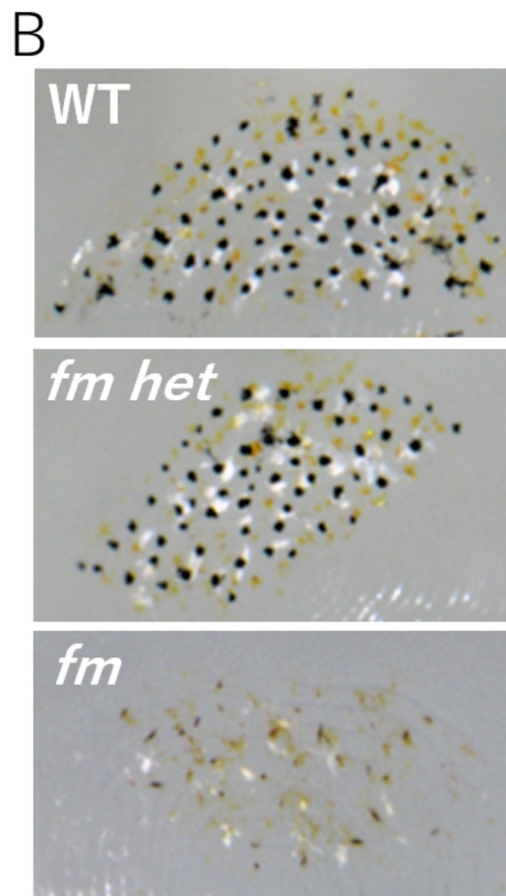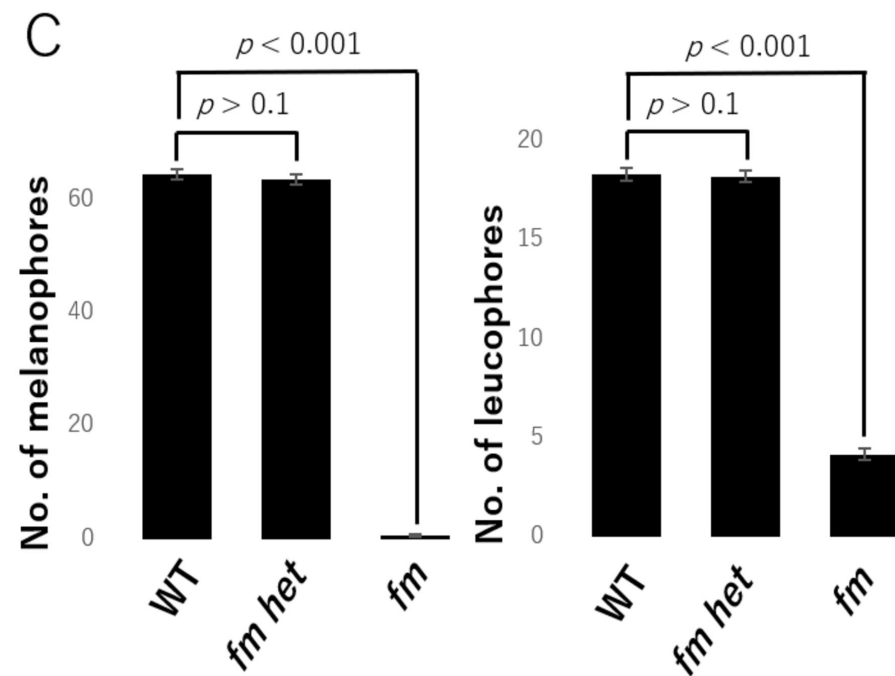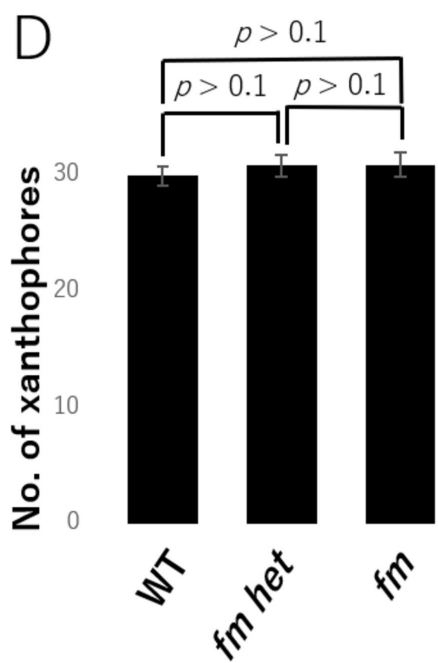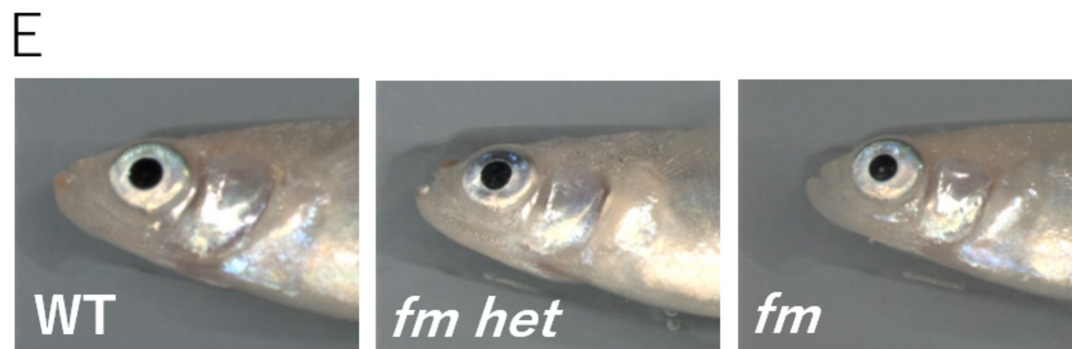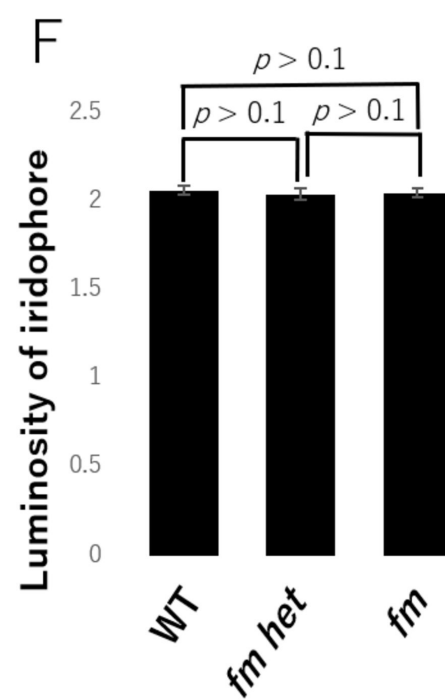

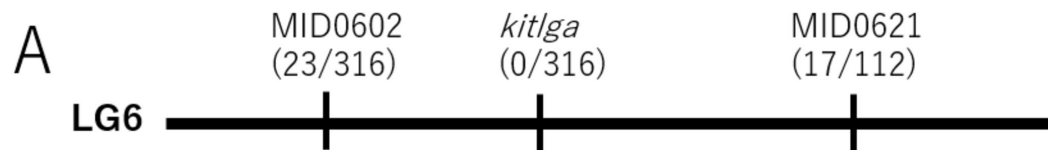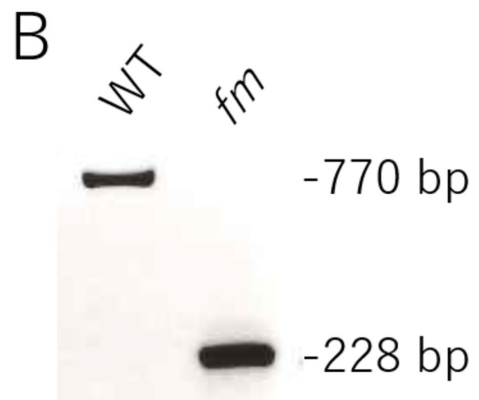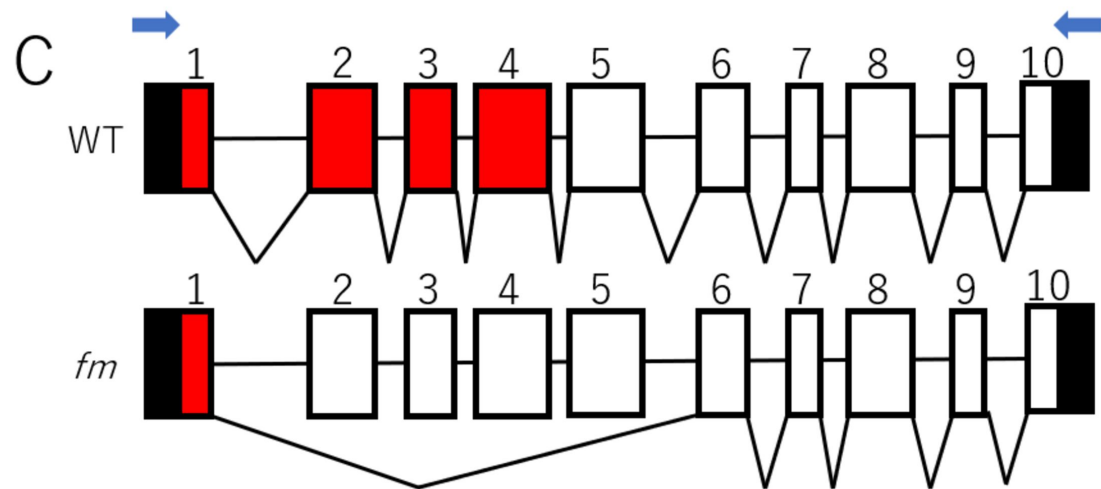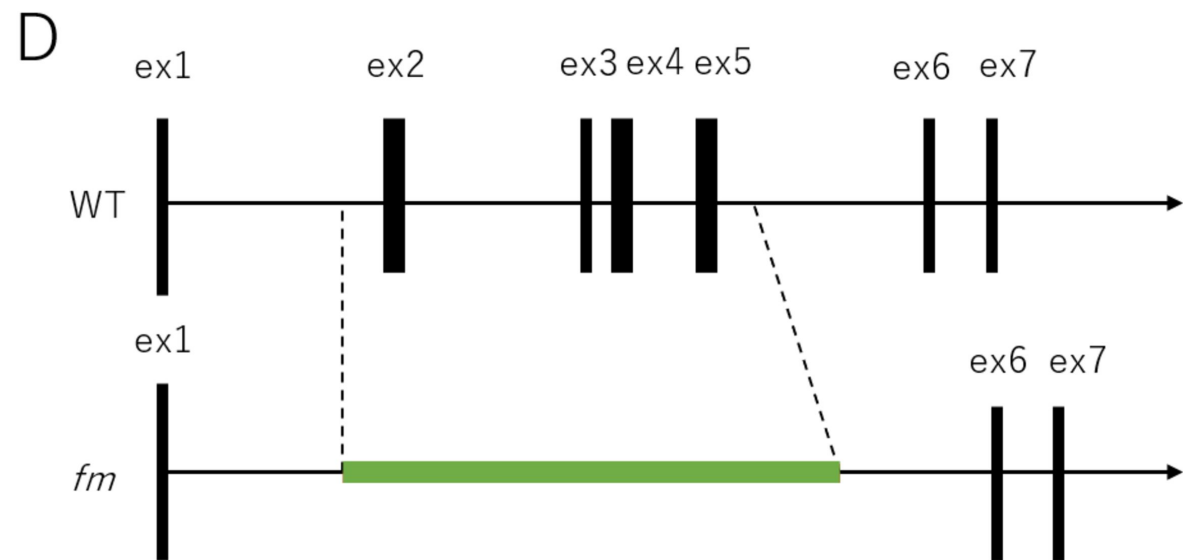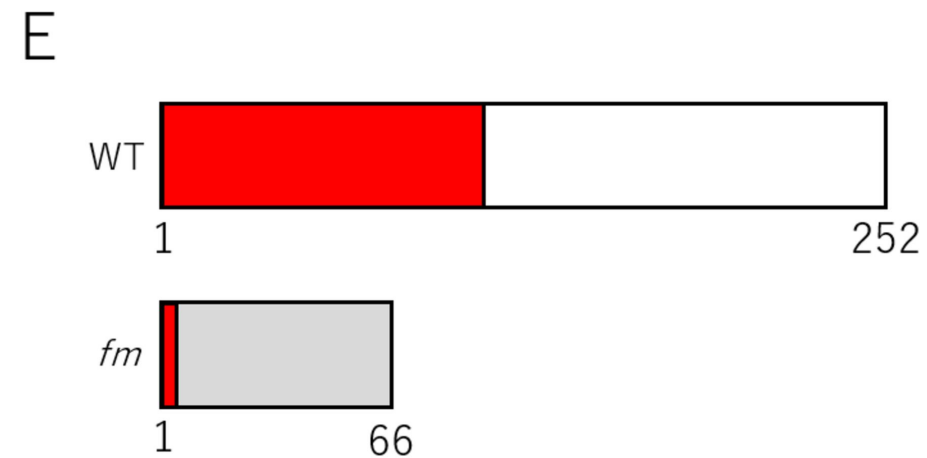

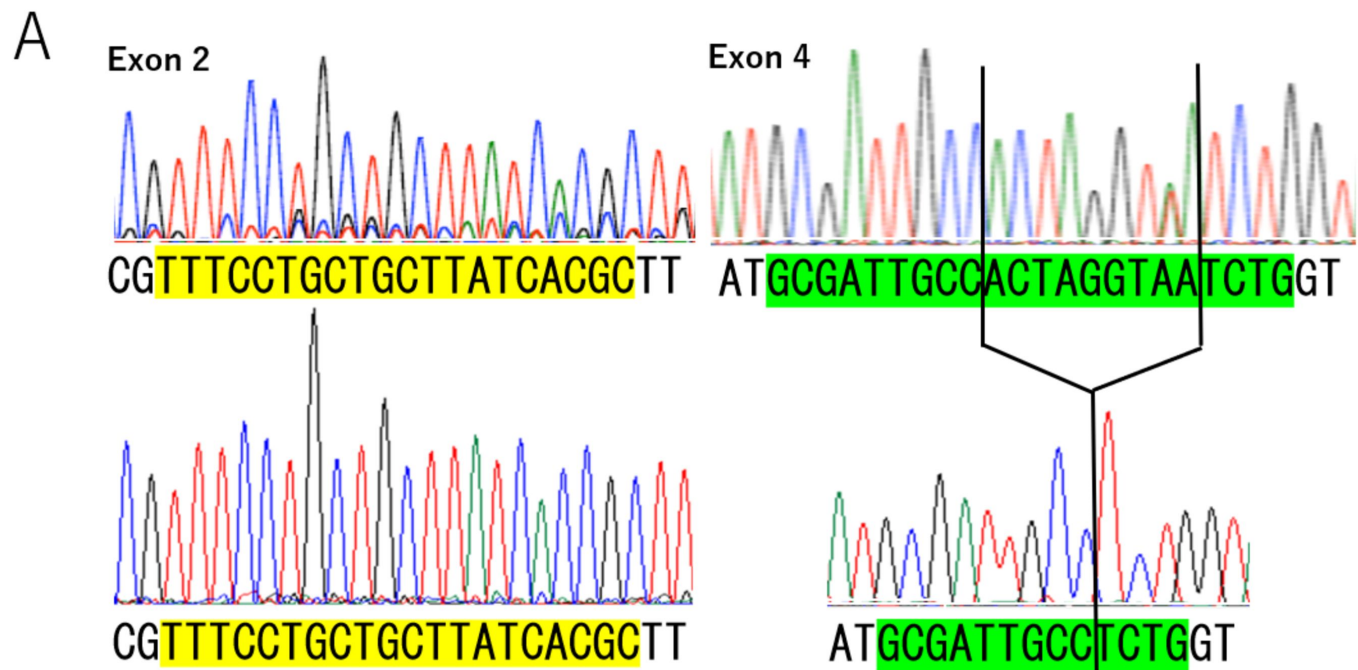

**B**

WTMKKSKSWIRVCV**R**FLLLITL**L**GV...KIFIDMLQY**M**RLPLGNL**L**EP...

Kitlg KO MKKSKSWIRVCV**R**FLLLITL**L**GV...KIFIDMLQY**M**RLPL**L**EP...

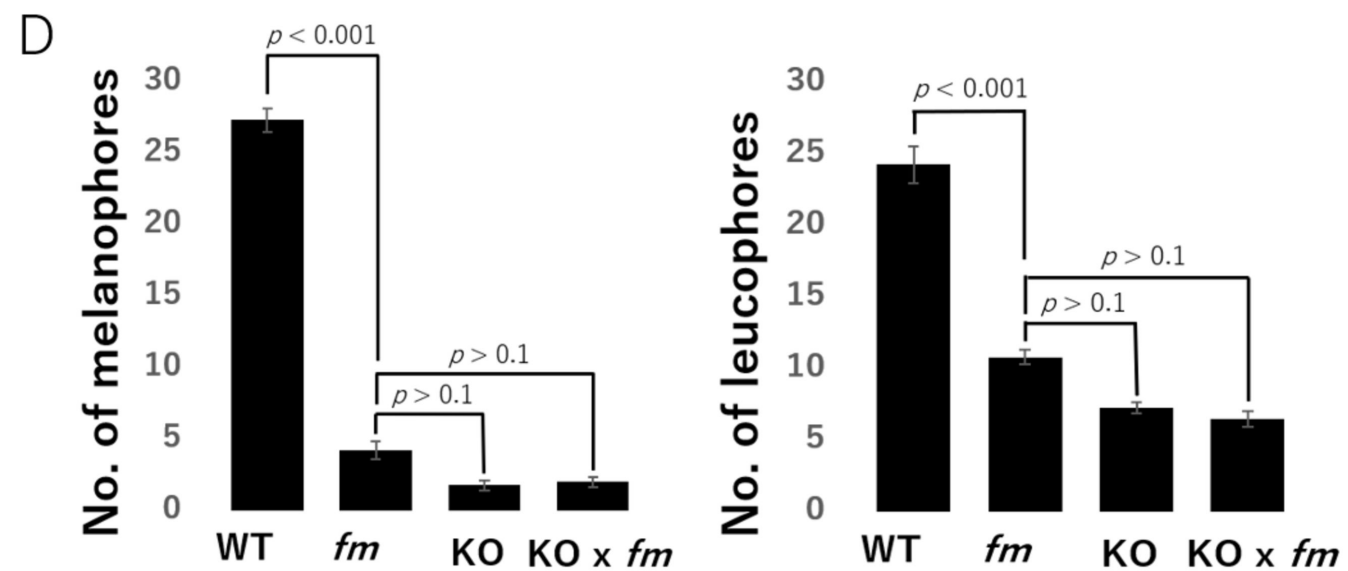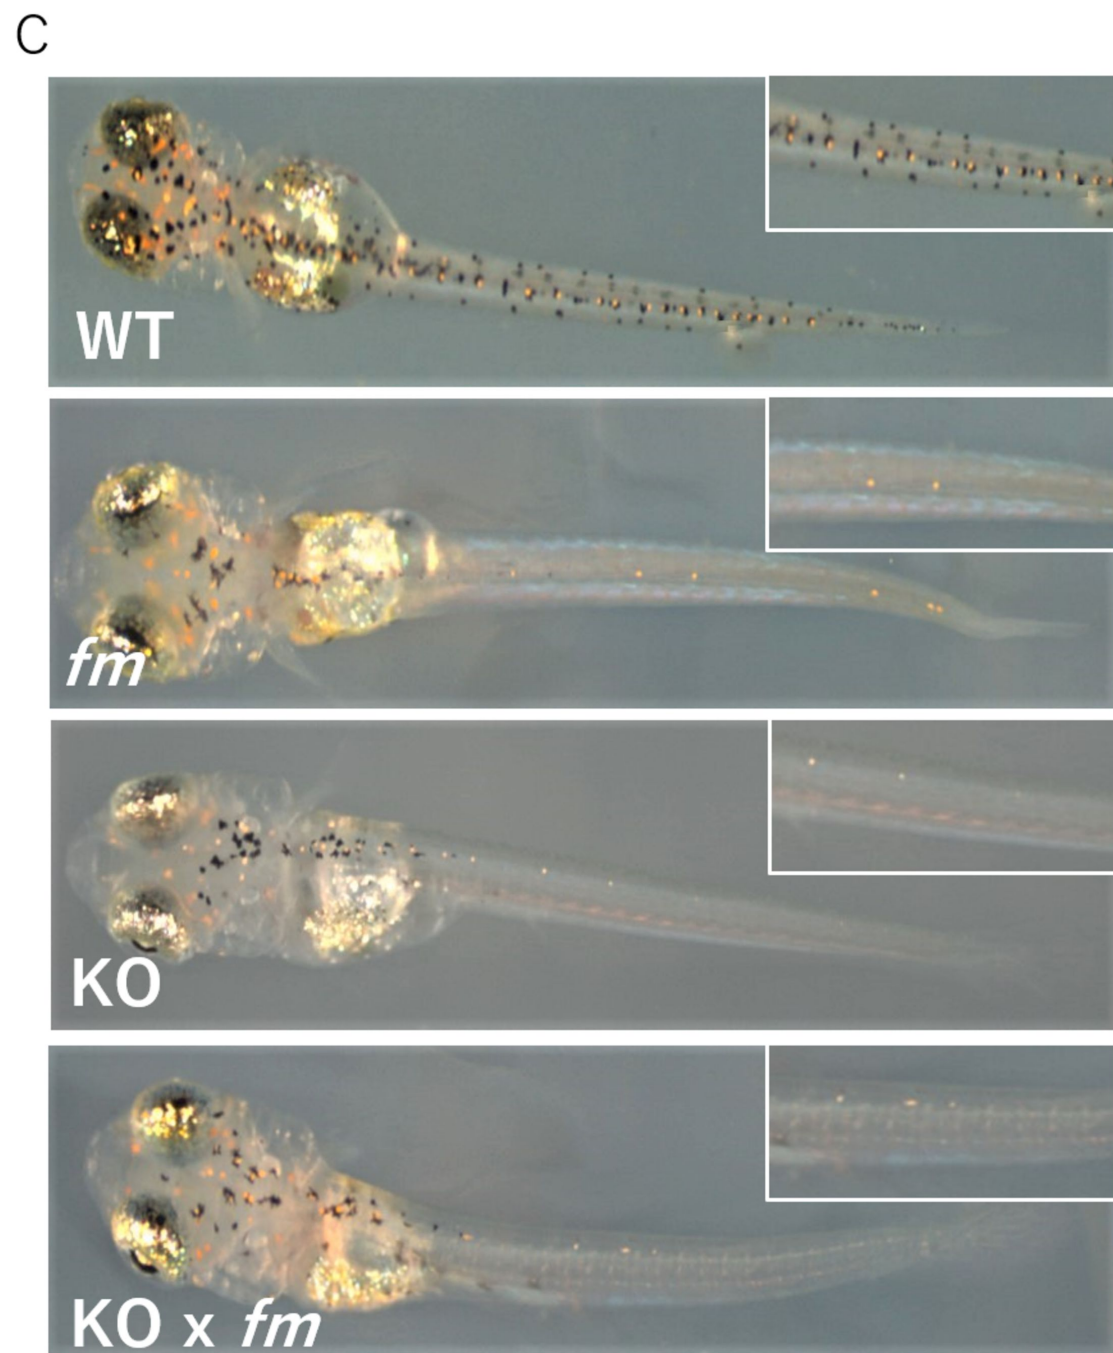

Table 1 Primer sequences and restriction enzymes for genotyping

| Marker        | Forward (5'-3')           | Reverse (3'-5')           |
|---------------|---------------------------|---------------------------|
| Scaffold 121  | CCATGACCGGTGTTTCTTT       | TCTACGACATCAATCACTGTGT    |
|               | GTTATGATACAGGCACGTGGC     | CGTTGTCAGTGAGTGTGTCA      |
| MID0621       | TGATGGACTGAAACTCAGATGAAG  | CTGCCTAAGCTCTCATGGGG      |
| OLe1804f      | CCTCATGCTCCGCAGGCTCAAGAA  | TTGGTTTCGCACAGACCCGGGTAC  |
| MF01SSA036H12 | GTCACATGGTTACAGCACTCAA    | ATACAGAGCATGGCAGACGAG     |
| MF01SSA105H04 | GTGAGAGTGTTCCTCTGACATGCGC | GCTGACCCTGGAAGGCATCTTTCAC |
| MID0602       | CTCAGACCCGTTCAAAGAAATG    | CATAGAGCCAGGGAACAGAG      |

| Restriction enzymes |
|---------------------|
|---------------------|

|        |
|--------|
| in/del |
|--------|

|        |
|--------|
| in/del |
|--------|

|        |
|--------|
| in/del |
|--------|

|      |
|------|
| FokI |
|------|

|      |
|------|
| MseI |
|------|

|      |
|------|
| DdeI |
|------|

|        |
|--------|
| in/del |
|--------|

Table 2. Primer sequences for quantitative RT-PCR.

| Gene              | Genebank accession No. | Primer sequence (5'-3') forward | Primer sequence (5'-3') reverse |
|-------------------|------------------------|---------------------------------|---------------------------------|
| <i>kit-ligand</i> | GFIO01037170           | TGCCACTAGGTAATCTGGAACC          | ATTGCTCTGTTTGCCAC               |
| <i>pax7a</i>      | AB827303               | CGTTTTGAGGGCCCGATTTG            | TAGTTGCTCCGCAGTGA               |
| <i>sox5</i>       | EF577484               | TGGAGAGGTAACCATGGCAAC           | GGGCTTCCAGATTTCCG               |
| <i>pax3a</i>      | GFIO01010990           | CCACACCTGAACTCGAGCTT            | TAGCCGCACCACCTTTA               |
| <i>mitfa</i>      | JF489892               | CAATGTCAGTGTCGACCA              | AGCTTCCCAGGTATCC                |



|           |
|-----------|
| ) reverse |
| TGC       |
| \AGG      |
| iGTTAG    |
| CAG       |
| iTCT      |

Figure s1. The genome list in the phylogenetic tree

| Gene name                                  | Species                                           | Accession number     |
|--------------------------------------------|---------------------------------------------------|----------------------|
| kit-ligand a                               | <i>Oryzias latipes</i>                            | XP_011471186.1       |
| kit-ligand b                               | <i>Oryzias latipes</i>                            | XP_023808347.1       |
| kit-ligand a<br>(kitlga-201 peptide)       | <i>Xiphophorus maculatus</i>                      | ENSXMAP00000018801   |
| kit-ligand b                               | <i>Xiphophorus maculatus</i>                      | ENSXMAP00000003998   |
| kit-ligand                                 | <i>Gasterosteus aculeatus</i><br><i>aculeatus</i> | ABW91105.1           |
| kit ligand-like                            | <i>Oncorhynchus mykiss</i>                        | XP_021432382.1       |
| kit ligand-like                            | <i>Salmo salar</i>                                | XP_013981138.1       |
| stem cell factor<br>precursor              | <i>Takifugu rubripes</i>                          | NP_001153658.1       |
| kit-ligand                                 | <i>Astyanax mexicanus</i>                         | XP_022539640.1       |
| unnamed protein product                    | <i>Tetraodon nigroviridis</i>                     | CAG05577.1           |
| uncharacterized protein<br>(LOC101068411)  | <i>Takifugu rubripes</i>                          | XP_011611710.1       |
| uncharacterized protein<br>(LOC110500014 ) | <i>Oncorhynchus mykiss</i>                        | XP_021432813.1       |
| kit-ligand b<br>(kitlgb-201 peptide)       | <i>Esox lucius</i>                                | ENSELUP00000001403   |
| kit-ligand a<br>(kitlga-201 peptide)       | <i>Esox lucius</i>                                | ENSELUP000000011575  |
| kit-ligand b                               | <i>Danio rerio</i>                                | NP_001018137.1       |
| kit-ligand a<br>(kitlga-203 peptide)       | <i>Danio rerio</i>                                | ENSDARP000000145973  |
| kit-ligand a<br>(kitlga-201 peptide)       | <i>Oreochromis niloticus</i>                      | ENSONIP00000004881   |
| ENSONIP00000014821                         | <i>Oreochromis niloticus</i>                      | ENSONIT00000014833.1 |

|                                                            |                                  |                                                |
|------------------------------------------------------------|----------------------------------|------------------------------------------------|
| kit-ligand a<br>(kitlga-201 peptide)<br>ENSGMOP00000011599 | Gadus morhua<br><br>Gadus morhua | ENSGMOP00000010996<br><br>ENSGMOT00000011915.1 |
| kit-ligand a                                               | Spotted gar                      | ENSLOC00000016368.1                            |

---

Amino acid sequence

MKKSWSWIRVCFRLLITLGVPSCTFGSFQITDDISKLSVLKQNIQRDYNISVRYIPKELAGMCWVKLNIFMEESLNELAKKFGNVSSN  
KNDIKIFIDMLQYMRLPLGNLEPLMYDFECHFRNEQWQTEQYFDYVVDLLKAAEDNISDDCDPPPCPTSLPTETFTSISCTGCSRAT  
MRKKILQATWFLSLLSLKSCGKFGAPITDDVNKLSVLKQNIQSDYEIPVSYIPKEVAGTCWVVLNIYPLEQSLRKLSTMFGAISSNKDTI  
TVFIAMKLSLRFTFDHEELETVMQVFQCHYQEQLQSSLYFDHIRDVLRAAAQSSGFSCKPPPCRNHQGGQEKSRGHSWLMRSPLL  
MKKSWSWIDVCVHFLLFMTLGVHSAATGKVVNDIDRRVPDLRQNIKDYKIPKIPKIPKIPKIPKIPKIPKIPKIPKIPKIPKIPKIPKIPKIPKIP  
KLNIQILIQFIEEKRIGISNMNPQMFEFCHYRVDKWETGKYNFVEEVNADNRPEREECDPPPCPTPIPTTESSSVQSTSGHDMYSY  
NIATKDIRSSASSPSLRQVVEKLSLFLVPLLALIFLLVWVRSRRNVQHPRSNRGEEGFTPEHLMAPRQDGETSEKNALNLP  
MRKKIISTTCVLLGLFSSLLHLSGKFGTPITDDVSLSVLKQNIQSDYEIPVGYIPREVAGTCWVVLNIYPLEQSLKELASMFAGVSSNRDD  
VNIFVTMLKSLRFTFDHEELEAAMQDFQCHYREKSLLSGLYFDYIQDILLRAATQGTLSFCQPQPCLNHPQTAEGQEESHKYRWLKS  
MKKSkiwIrvCVHILLFITLGVHSSKFDVNPVTDISRLSILRQNIKDYKIPVNIYPREEGMCMWVKLVNFYLEESLKLGLAHHKFGNVSSNR  
KDISIFIQMFQELRLNMGLEAIMNDFQCHYREERWQTARYFDFVKDFLIAAQNKEDSDYCDPPPCPTTPYAVTTADYLNATSEPGPP  
KCADCKPKPETLSGVLEQSLLSFIPLVALIFLLVWVRSRREENLQQSPGEGGLFPGAEATAPPLDTEISEKNMNLNIEIE  
MKKPKiwIrvCVHLLLCITLGVQSSSEFGNTVTDITRISLLKQNIKDYKIPVTVYVPEVGGMCMWVALNVFHLELSLRGLADKFGSISNK  
YNIILIEMLKetryHMKNLEAITYDFECHYRNEQWQTGHYFHVEDFLKTARLNRLDPEECDPPPCPTATMTDTIITQYPTSVNYP  
TEFNMSAPDSETWNEPLRFLPEVVERSSLLVIPIAAVVFLFAWKVSRNRQHQSDERNSEVEGLFTGPEGLAPLEPESEKRNILNIV  
MKKPKiwIrvCVHLLLCITLGVQSSSEFGNTVTDITSISLLKQNIKDYKIPVTVYVPEVGGMCMWVALNVFHLELSLRGLADKFGSISNK  
YNIILIEMLKetryHMKNLEAITYDFECHYRNEQWQTGHYFHVEDFLKTARLNRFPEECDPPPCPTATMATTITQYPTSVNYP  
TEFNMSAPDSETWNEPLRFLPEVVERSSLLVIPIAAVVFLFAWKVSRNRQHQSDERNSEVEGLFTGPEGLAPLEPESEKRNILNIE  
MKKSKIRIRICVHLLLFITLGVHSTKFDVNPVTDISRLSVLKNIPKDYKIPLDIYIPKATGGICWVKLVNFLENLHNSHTFGNISNRK  
DLSIFIKMFQELRNFLEPVEPIMYEFDCHYRKERWQTAKYFDLKEFLIAAQNGDNSDDCEPPPCPTSPRVTTTEYLTESSTVISNGPE  
CTTGCTTYHNPSPLEVVVERSSLLFIPLVALVFLVWVRSRRNRREDMEQDSGERGCFTGAEGTASPLDADISEKNLSTIETV  
MKKSkiwIrvCVHLLLYITVAAYSREIGNPITDDIKISLLKQNIKDYKIPVTVYVPEVGGMCMWVALNVFHLEESLKVLAQKFGNVSSNKDNI  
ETFVQMLREMRFHIGHTLEDDMQQFECHYREEKWLARYFEFVEGFFNTANSREAGCDSPPCPTTTKTISTTIVTASVTHHHSRGS  
SFAQNSTAEKEATNQRILPEVLERSSLLFIPLIGVVFLLIWKVSRNRNDPPVQRSSEGPPLFIGAEASAPPLDDISEKNRLTLVREV  
MATALCALSRSADIRIRSCVHLLLFITLGVHSSKFDVNPVTDISRLSILKNNIPKDYRIPLDIYIPKATGGMCMWVKLVNFLENLHNSHT  
FGNVSSNRKNLSIFIKMFQELRNFLEPVEPIMYEFDCHYRKEWYTAQYFDLKEFLIAAQNGDTSDDCEPPPCPTTPPESTEEYLDH  
MTPITDDVSKLSLQNIQSDYEIPVSSIPKDVAGTCWVVLNIYPLEQSLRNLAGMFGAVSSNREQISVFISMLKSLRFTFNHEELEAAM  
QLFQCHYRERGLMSGLYFDYIKDILHAASQGTSGLPCKPPPCLNQHPSGGQEERGSWSIRAPWILVLPFTACAVILLWLGKSGRLS  
MKSKIRITTCVLLFLTSLGVCSSGFGNPVTDVSRMLMMLKHNIPKDYNIHYPKERSGVCMWVLLNIYPLEQSLRELARVFGAISSNKDN  
IMIFITMLQNLRFKFDHEELETMQVFKCHYRAVKWPSGQYFDYIRDILNSAAQGGGFRCPVPPCAPPTTPGSEAQDHEQTRSRSGL  
MKSKIRITTCVILLFTLTSFGICSGGFGNPVTDVSRLLLLKNNIPKDYKIPINHIPKNMSGVCWVLLNIYPLEQSLRELAQVFGAISSNKDN  
IMLFITMLQNLRFKFDHEELEVMTQMFKCHYREVKWPTGQYFDYVRAILNSAGKGGGFRCPVPPCAPSSAPGSEAQDHDQTRSRS  
MKKPKiwIrvCVHLLLCITLVQSSSEFGNAVTDITSISLLKQNIKDYKIPVSYIPEDVGGMCMWVTLNFRLEVSLQGLAEKFGNVSSNKY  
NISILIEMLKetryHIKNEAVMNDFECHYRDDQWQTGRYFHFVENILKTARSNRNSPEECDPPPCPTTPTTPLPYPSSEPNYPTKC  
DIAEKSCSTRTESLVSEVLGKSSLLVIPIVAIVFLVWVRSRRNKD KPDENNSVEGLFTGIEGNVPPLEETSEKNRLNIIETV  
MFHMREVKIGESICVLVLLFSLVTCGSVFGSPLTDDVATLDTLSENIPSVDYRIPKIPKIPKIPKIPKIPKIPKIPKIPKIPKIPKIPKIPKIPKIPKIP  
NKANITIFITMLQDFRFTLNSDDLEDRMQAFKCHYRREKWPTRRFFSYVSVLTVAGSTYGDIPPCPTPPCQTLAAPPFTPGQSRQQN  
GMNSAVHGALLIIPSAIVLTIQMALGRRGRCARMREIEPHDRAEENRNELHSGAAQEDPASTSASEQDRAWLDSLGCADTEV  
MKKSNIWICTCVHLLLYITVAAYSIEIGNPITDDIKISLLKQNIKDYKIPVRYIPKEVSGMCMWVKLVNFHLEVSLKGLAQAQKFGNVSSNKD  
NIGTFVQILQDMRYHIGPGLSDMLDFECHYVEEMWLTAKYFEFLEDFNTANSSRDAEDCEPPPCPTSTKTITTTTTASTTSAQHST  
NEKRNLPPDDPEKGAFLSKVLESNLMWLLTIPFAIAVVVLLVWVRSRRNPQDRSPEEGPALFSGEEANISPLDVGISEKNRLNIIMD  
MKKSWSWIHVCVHFLLFITLGVHSDRLNINPVTDIAKSLTLRQNIKDYLIPIYIPKEEAGMCMVKLVNFYLEESLERLSEKFGNVSSNK  
ENISIFIQIQEQRVHMQLDNLIMLDFECHYREERFDNQYFDYFIEDLLRAVENKEDAHDCDVPCCPSPLTEKYEESPTPTSNAPLCP  
NDCKTSQQQRLLPEVVERSSLLFIPLLAIVFLVWVRSRRNQDGVQQNPAEEGLTGTEGTAPPLDTEISEKNMNLNIEIV  
MDVKVPCLLSLLTNLNLCFEYGPSVTDLVALMKQDLPNNYLIPISYVPKEVAGTCWVVLNIYPMESKLEKLTNNFGDKSTNRESLLIFIEI  
LQTVWLKFDHMEVEILMQYFDCHYQE

PLAPQIWIRAYVHVLLCITLGVYSSEFDVNPVTDDIDRLAVLRENIPKDYKIPVHFVPKEEAGMCWATLNVYYLEDSLKELSHTFGNISS  
RKDISIFIQMLQEVRLKMGVEMTMYDFECHYRKEKWPTARYFNFKDFLMEAQFPDDSDADCDPPPCPSAAHLPEAVERSLLSLLFIPL  
VSELYMWICKTPCLLFFLLTSLHHCSGKFGTPTDDVKNLLLLQQNIPVDYIIPVHYIPKEVSGVCWVVLNIYPLEQSLCKLATMFGALSS  
NKENIIVFIAMKSLRFTFDHEELESAMQVFQCHYRERNLLSGLYFDYIKEILHAAAQGVGGFPCPPPCVPHQETPETQLTLNLTLLSYQH  
MKKAKIWITAFICYLFLCITFVERACGLGSPITDDVNVIPLLKQNIKDYKIHVRYIPRPEAVNDMCWVQLNIYYLEKSLSNLTKQFGNISS  
NKENISLLTHMMQNMRLLEYTDKVFLEFKMREFDCHYKEDKLLTENYFDYVTDIFDITYRQHENEHLSDTCDSPPCPTTTREPTTVTTGST  
IITGIRTTACTAAANCTPDKQTSDESGVKDKMQFLYLLITPLCGLVLLAMWKVRSRRRSFPGNISNGRLQREEVDSTSEEIEKLKTIQ
